1 **Title:**

2 **Physiological regulation of bud burst in grapevine**

3

4 **Authors:**

5 Santiago Signorelli<sup>1,2,3</sup>, Jeremy Shaw<sup>4</sup>, Dina Hermawaty<sup>2</sup>, Zi Wang<sup>5</sup>, Pieter Verboven<sup>5</sup>, John  
6 A. Considine<sup>2</sup>, Michael J. Considine<sup>1,2,6,7</sup>

7

8 **Affiliations:**

9 <sup>1</sup> The School of Molecular Sciences, The University of Western Australia, Perth, WA 6009,  
10 Australia

11 <sup>2</sup> The UWA Institute of Agriculture, and School of Agriculture and Environment, The  
12 University of Western Australia, Perth, WA 6009, Australia

13 <sup>3</sup> Laboratory of Biochemistry, Department of Plant Biology, Universidad de la República,  
14 Montevideo, 12900, Uruguay

15 <sup>4</sup> Centre for Microscopy, Characterisation and Analysis, The University of Western Australia,  
16 35 Stirling Hwy, Crawley, WA, Australia

17 <sup>5</sup> Division of Mechatronics, Biostatistics and Sensors (MeBioS), KU Leuven, Leuven 3001,  
18 Belgium

19 <sup>6</sup> Department of Primary Industries and Regional Development, South Perth, WA 6151,  
20 Australia

21 <sup>7</sup> Centre for Plant Sciences, School of Biology, University of Leeds, Leeds LS2 9JT, UK

22

23 **Correspondence:** ssignorelli@fagro.edu.uy (tel. +32483348482),

24 michael.considine@uwa.edu.au (tel. +618 6488 1783)

25

26 **Other authors emails:** JS, jeremy.shaw@uwa.edu.au; DH,

27 dina.hermawaty@research.uwa.edu.au; ZW, zi.wang@kuleuven.be; PV,

28 pieter.verboven@kuleuven.be; JC, john.considine@uwa.edu.au

29

30 **Date submitted:** 22/11/18

31 **Figures:** 7; Figs 3, 6 and 7 in colour (print).

32 **Tables:** 0

33 **Supplementary Figures:** 7.

34 **Supplementary Movies:** 1.

35 **Word count: 7794**

36

37 **Highlights**

- 38 • The apoplastic pore size between the grapevine bud and the mother vine is
- 39 dynamically regulated in the transition to bud burst.
- 40 • The molecular exclusion size of the apoplastic connection between the bud and cane
- 41 is calculated 2.1 nm prior to the initiation of bud burst.
- 42 • The structural heterogeneity of the bud explains the spatial variance in tissue oxygen
- 43 status, and the meristematic core is oxygenated during the initiation of bud burst.
- 44 • Long distance maternal signals are not a requirement for bud burst.

45

46 **Abstract**

47 The physiological constraints on bud burst in woody perennials, including the prerequisite for  
48 vascular development remain unresolved. Both light and tissue oxygen status have emerged  
49 as important cues for vascular development in other systems, however, light requirement  
50 appears to be facultative in grapevine, and the information related to the spatial variability of  
51 oxygen in buds is unclear. Here, we analysed apoplastic development at early stages of  
52 grapevine bud burst and combined molecular modelling with histochemical techniques to  
53 determine the pore size of cell walls in grapevine buds. The data demonstrate that quiescent  
54 grapevine buds were impermeable to apoplastic dyes (acid fuchsin and eosin Y) until after  
55 bud burst was established. The molecular exclusion size was calculated to be 2.1 nm, which  
56 would exclude most macromolecules except simple sugars and phytohormones. *In vivo*  
57 experiments show that grapevine buds were able to resume growth even following excision  
58 from the cane, and that the outer scales of grapevine buds may participate in the biochemical  
59 repression of bud burst. Furthermore, we demonstrate that the tissue oxygen partial pressure  
60 data correlated well with structural heterogeneity within the bud and differences in tissue  
61 density. These data consolidate evidence that the meristematic core becomes rapidly  
62 oxygenated during bud burst. Taken together, and when put in the context of earlier studies,  
63 these data provide solid evidence that the physiological and biochemical events that initiate  
64 bud burst reside within the bud, and question the role of long distance signalling in this  
65 developmental transition.

66

67 **Keywords:**

68 Apoplast, Bud, Bud burst, DFT, Dormancy, Grapevine, Light, Oxygen, Hypoxia,  
69 Development, Computed Tomography.

70

71

72 **Introduction**

73 Grapevine is the most economically important fruit species worldwide, providing fruit for  
74 fresh, dried and processed food and beverage industries, and grown commercially in over 100  
75 countries. The phenology and habit of grapevine is remarkably plastic, displaying strong  
76 seasonality and a deciduous habit in temperature regions, while tending towards evergreen in  
77 tropical climates (Possingham, 2004). The present understanding of the physiology of these  
78 dynamics and the cues that underpin this plasticity is far from complete (Lavee and May,  
79 1997; Considine and Considine, 2016). Improving this knowledge is important to optimise  
80 plant productivity, especially in marginal climates or seasons. In particular, an improved  
81 knowledge of the physiology of bud burst is fundamental to enable better canopy  
82 management and crop forecasting, as the timing and coordination of this event greatly  
83 influences flowering, fruitset and ripening.

84

85 The axillary buds of several species require light for bud burst or outgrowth (Leduc *et al.*,  
86 2014). Several grapevine studies have investigated the influence of low intensity light on bud  
87 fruitfulness or shoot physiology, suggesting that it is adapted to a low light environment  
88 (Alleweldt and Hofacker, 1975; May *et al.*, 1976; Cartechini and Palliotti, 1995; Petrie and  
89 Clingeffer, 2005; Sánchez and Dokoozlian, 2005). However, there are few reports on the  
90 absolute light requirement for bud burst. Although we previously showed that grapevine buds  
91 do burst in the absence of light (Meitha *et al.*, 2018), there was evidence of light-responsive  
92 gene expression well-before leaf tips emerge through the scale, indicating perception and  
93 early resumption of autotrophic capacities (Signorelli *et al.*, 2018). These observations  
94 require further physiological elaboration.

95

96 Our physiological and molecular data also suggest a developmental role for oxygen (hypoxia)  
97 in the initial transition to bud burst (Meitha *et al.*, 2015, 2018), corroborating earlier  
98 suggestions from gene expression studies (Or *et al.*, 2000; Ophir *et al.*, 2009; Vergara *et al.*,  
99 2012). More than a third of the widely conserved hypoxia-responsive gene homologues and  
100 numerous genes with a hypoxia-responsive promoter element were differentially regulated  
101 during the first hours of bud burst (Meitha *et al.*, 2018). Interestingly, we observed that the  
102 internal pO<sub>2</sub> (oxygen partial pressure) minima was peripheral to the meristematic core of the  
103 bud following the initiation of bud burst, suggesting an internal source of oxygen (Meitha *et al.*  
104 *et al.*, 2015). However, the spatial resolution of the pO<sub>2</sub> data was limited in these studies, which

105 we hypothesise reflects the morphological heterogeneity within and between biological  
106 replicates. If this is the case, coupling this analysis with x-ray micro-computed tomography  
107 ( $\mu$ CT) and tissue density and porosity data should reveal direct correlations and provide a  
108 more accurate illustration of the spatial variation and magnitude of  $pO_2$  within the bud.

109

110 An early indicator of the transition to bud burst is ‘sap-flow’; the sudden increase in xylem  
111 pressure and the concentration of phytohormones and sugars in xylem sap that precedes bud  
112 burst (Skene, 1967; Skene and Antcliff, 1972; Sperry *et al.*, 1987). Shoots are known to  
113 provide water and nutrients for bud development, until the bud is photosynthetically active  
114 and autotrophic (Michailidis *et al.*, 2018). A role for callose deposition in gating the symplast  
115 during the onset and relief of dormancy, metabolically isolating the bud has been illustrated  
116 (Aloni and Peterson, 1991, 1997; Aloni *et al.*, 1991; Rinne *et al.*, 2011). Yet, further  
117 investigation of this role of callose is required (Beauvieux *et al.*, 2018), as recent reports  
118 showed that callose does not explain the changes in connectivity and the molecular size  
119 exclusion limit that occurs during development and stress response (Tilsner *et al.*, 2016;  
120 Nicolas *et al.*, 2017). In addition, very little is known of the regulation of apoplastic  
121 connections during bud burst, which could play a significant role in delivering long range  
122 signals from the root or shoot to the bud, given the xylem sap pressure and composition. The  
123 evidence and assumptions of recent studies has been that non-cell-autonomous signals that  
124 regulate dormancy transitions, such as peptides, are synthesised in embryonic leaves within  
125 the bud (Rinne *et al.*, 2011; Paul *et al.*, 2014), however the role of the apoplast in delivering  
126 signals cannot be excluded.

127

128 Taking these physiological considerations together, we carried out a series of physiological  
129 experiments in order to dissect the influences of light, oxygen and apoplastic connection in  
130 the regulation of the initial transition to bud burst. We also defined an apoplastic molecular  
131 exclusion size for grapevine buds. These studies also provide important chemical modelling  
132 data on two major apoplast-mobile dyes, eosin Y and acid fuchsin.

133

## 134 **Materials and Methods**

### 135 *Plant material and growth under D and DL conditions*

136 Unless otherwise stated, water used throughout the study was Milli-Q<sup>®</sup> water (MQW,  
137 Merck-Millipore, Bayswater, Australia) and chemicals were analytical grade from

138 Sigma-Aldrich (Castle Hill, Australia). Merlot canes containing mature, dormant buds from  
139 node 3 to 12 were collected from a vineyard in Margaret River, Australia (34°S, 115°E). The  
140 canes were transported to the lab and stored at 4°C until required (no longer than 40 days of  
141 storage). Single node cuttings (explants) were prepared as previously described (Meitha *et*  
142 *al.*, 2015, 2018), treated by submersion in hydrogen cyanamide (HC) 1.25 % w/v (Sigma  
143 #187364) in water for 30 seconds and then planted on peat. In this respect we consider  
144 experimental buds were non-dormant. Explants were grown under dark-light (DL, 12:12h)  
145 conditions or in complete darkness (D) and used to perform the experiments described below.  
146 The photon flux density for the DL condition was between 200-300  $\mu\text{mol photons}\cdot\text{m}^{-2}\cdot\text{s}^{-1}$ .

147

#### 148 *Bud burst experiments in D and DL*

149 Trays containing 50 explants each were used to quantify the rate of bud burst in D or DL  
150 conditions over 52 days. The experiment was performed 4 times using samples collected  
151 between late February and early June 2016 (southern hemisphere). The observed response  
152 was consistent, with the exception that the time to 50% bud burst decreased as the year  
153 progressed, as previously shown in other studies (Or *et al.*, 2002; Parada *et al.*, 2016). The  
154 data presented here represent the explants planted on the 2<sup>nd</sup> May 2017. The explants were  
155 treated with HC, or untreated, as indicated in the Results. The trays containing the explants  
156 were irrigated with potable tap water every second day to ensure a field capacity of at least  
157 80%.

158

#### 159 *CO<sub>2</sub> release and O<sub>2</sub> consumption*

160 CO<sub>2</sub> production was measured as described previously (Meitha *et al.*, 2015, 2018), using 3  
161 pools (n=3) of 8 excised buds each, within an insect respiration chamber (6400-89; Li-COR,  
162 Lincoln, NB, USA) attached to a Li-6400XT portable gas exchange system. The  
163 measurements were performed in complete darkness, at 23 °C, in CO<sub>2</sub>-controlled air (380  
164  $\mu\text{mol CO}_2 \text{ mol}^{-1} \text{ air}$ ) with 100  $\mu\text{mol m}^{-2} \text{ s}^{-1}$  air flow, at 55–75 % relative humidity.

165 Oxygen consumption was determined with 5 pools (n=5) of 8 buds each. The buds were  
166 placed in a 4 mL micro-respiration chamber (Unisense, Aarhus, Denmark) and the pO<sub>2</sub> was  
167 monitored for at least 10 min using an O<sub>2</sub> microsensor (Clark-type, Unisense). The  
168 calibration of the sensor was performed determining the potential at 0% pO<sub>2</sub> and atmospheric  
169 pO<sub>2</sub>. The 0% O<sub>2</sub> condition was achieved flushing N<sub>2</sub> into the calibration chamber until  
170 reaching a constant reading, whereas the atmospheric pO<sub>2</sub> was determined by flushing air into  
171 the chamber and taking into account the temperature of the room. Measurements were

172 performed at 23 °C in complete darkness and keeping the micro-respiration chamber under  
173 water to prevent sudden changes in temperature. As a negative control, every day the pO<sub>2</sub> in  
174 an empty micro-respiration chamber was also measured 5 times of 10 min each. The average  
175 of the slopes obtained with an empty chamber was subtracted to the measurements of the  
176 samples. The volume of the buds was determined using a 25 mL density bottle. This  
177 information was necessary to determine for each replicate the final volume of air in the  
178 chamber.

179

180 Following measurement of the CO<sub>2</sub> release and O<sub>2</sub> consumption, the buds were dried in an  
181 oven for 72h at 70 °C to determine the dry weight (DW) and the respiration rates were  
182 calculated. Note that RQ values cannot be deducted from this data because the conditions of  
183 measurements are different for CO<sub>2</sub> and O<sub>2</sub>.

184

#### 185 *Internal pO<sub>2</sub> profiles*

186 The internal O<sub>2</sub> (pO<sub>2</sub>) was measured using an O<sub>2</sub> microsensor (Clark-type, Unisense) with a  
187 25 µm tip as previously described (Meitha *et al.*, 2015, 2018). The calibration of the sensor  
188 and measurements were done using the Sensortrace Suite software. For calibration of 0 kPa  
189 O<sub>2</sub>, the sensor was flushed with N<sub>2</sub> until stabilization, and for normal pO<sub>2</sub> concentration, a  
190 fish pump was used to flush the sensor with atmospheric air. The buds were removed from  
191 the cane and stood on a flat surface and then the electrode was electronically inserted from  
192 the top to reach the centre of the meristem as described in Meitha *et al.* (2015). The depth of  
193 the path changed depending on the size of the bud, but it was usually between 2900-3700 µm  
194 with steps of 36 µm and 3 measurements per step. The profiles were performed in at least 8  
195 buds for each condition and time (n=8).

196

#### 197 *Apoplastic connection*

198 Both, acid fuchsin and eosin Y solutions were prepared dissolving 0.5 g of the respective dye  
199 in 0.01 M phosphate buffer pH 6.0. The solutions were filtered through GFA filter paper and  
200 then through a 0.2 µm membrane filter. Explants were sampled from growth conditions at the  
201 corresponding times and cut 1.5 cm beneath the bud and immediately transferred to 25 mL  
202 plastic tubes containing 2 mL of eosin Y or acid fuchsin solutions. Unless otherwise stated  
203 the incubation time in the solution was 24h. A razor blade was used to make a longitudinal  
204 cut through the centre of the buds, and the images were taken using a camera, coupled to a  
205 magnifying glass. At least 3 replicates were used per dye per time (n=3).

206

207 *Vascular connection and porosity by micro-computed tomography*

208 Grapevine canes collected on the 4<sup>th</sup> April 2016, were sent to Belgium via World Courier and  
209 kept at a constant 4°C. The explants were planted on the 23<sup>rd</sup> May 2016 in D and DL as was  
210 done for bud burst analysis. Three buds of each condition (0h, 48h, 72h, 168h each D and  
211 DL) were incubated overnight with CsI 10% at 4 °C. 3D imaging using micro-computed  
212 tomography ( $\mu$ CT) was performed on each bud.  $\mu$ CT was performed with a Phoenix  
213 Nanotom (General Electric, Heidelberg, Germany) before and after incubation. For scanning,  
214 buds were mounted on the rotation stage by means of a Parafilm wrap. 2400 projection  
215 images per scan were taken with 0.15° angular steps for a full 360° rotation. Capture time for  
216 each image was 500 ms. Settings were 55kV/182uA for control samples, and 60kV/167uA  
217 for CsI samples. Image pixel resolution was 2.50 to 3.25  $\mu$ m depending on bud dimensions.  
218 Slice reconstruction was performed by Octopus Reconstruction version 8.9.0.9 (XRE, Ghent,  
219 Belgium) using the filtered back projection method.

220 3D image rendering and quantitative image processing was conducted in Avizo 9.6  
221 (ThermoFisher Scientific, Bordeaux, France). First, the bud volume was masked from the  
222 background and the Parafilm wrap used for scanning. This was achieved by applying a global  
223 threshold on the grey scale images complemented with erosion, dilation and filling operations  
224 on orthogonal image slices and the 3D volume. Second, the pixels inside each masked bud  
225 image were assigned to air or bud tissue using a simple grey scale threshold. Pixel values  
226 lower than or equal to 60 (on a 0 to 255 scale) were assigned to air, according to the greyscale  
227 range of the background. Pixel values higher than 60 were assigned to the tissue. Finally,  
228 different subsamples (with a representative volume larger than 100 by 100 by 100 pixels) of  
229 the different parts of the bud (outer and inner scales, trichomes, base) were taken from the 3D  
230 image to calculate local porosity. Porosity was defined as the proportion of total volume of  
231 air to the total volume of the subsample. Porosity values of tissues were averages of 3 buds  
232 per condition.

233

234 *Molecular modelling*

235 The geometrical structure of associated and dissociated forms of rhodamine green, acid  
236 fuchsin and eosin Y was fully optimized in aqueous solution at the B3LYP/6-31G(d,p) level  
237 integrated with the IEF-PCM polarizable continuum model without imposing symmetry  
238 restrictions and using solute cavities adapted to the molecular shape and constructed with  
239 Bondi radii. The nature of each minimum was verified by inspection of the eigenvalues of the



240 analytic Hessian in aqueous solution. Optimizations were performed at 298.15 K in the  
241 Gaussian09 program. All the calculations were performed using Gaussian09, rev. A.1 (Frisch  
242 *et al.*, 2009). To visualise the molecules, animate the vibrational modes and represent the  
243 electron density and the charges, the program Gaussview 9.0 was used. The solvent-  
244 accessible surfaces (or Lee-Richards surfaces) were determined using Jmol (The Jmol Team,  
245 2007).

246

#### 247 *Effect of scales on bud burst*

248 To determine the effect of the scales in bud burst the outer scale of the buds was removed  
249 using razor blades and forceps. These experiments were performed in the absence of HC. At  
250 least two replicates of 30 buds each were used for buds with and without scale in the different  
251 conditions (DL and D; n=2).

252

#### 253 *Bud porosity and humidity*

254 Five sets of five buds each (n=5) were used to determine moisture content and porosity. Each  
255 bud was dissected to separate the scale, trichomes and green tissues. The porosity and  
256 moisture were measured for each tissue. Fresh weight was recorder before measuring  
257 porosity. After measuring the porosity, the tissues were desiccated during 96h in an oven at  
258 70 °C and the dry weight determined. The moisture content was determined as follows:

$$259 \text{Moisture (\%)} = 100 * (\text{FW} - \text{DW}) / \text{FW}$$

260 To determine the porosity the volume of the tissues and the volume of air in the tissues was  
261 determined using a density bottle (Thomson *et al.*, 1990). The porosity was measured as  
262 follows:

$$263 \text{Porosity (\%)} = 100 * \text{Volume of gas in the tissue} / \text{Volume of tissue}$$

264

#### 265 *Bud burst on isolated buds*

266 Following treatment with HC 1.25%, 20 buds were peeled by removing the outer scale, and  
267 an equal number left intact. Then the buds were excised from the cane and placed in a solid  
268 Murashige Skoog (MS) medium, agar 0.8%, containing Plant Preservative Mixture (PPM) at  
269 0.2%. The buds were grown in the plate for 12 days under dark-light (DL, 12:12h)  
270 conditions. To evaluate growth, longitudinal sections were performed and they were observed  
271 under a magnifying glass. Digital images were taken with the camera coupled to the  
272 magnifying glass and with a ruler close to the buds as reference. The distances (height and  
273 width of bud and primary bud) were evaluated digitally.

274

275 *Effect of oxygen on bud burst*

276 Two trays containing 60 explants were placed in a custom gas-tight transparent chamber  
277 connected to an O<sub>2</sub> cylinder (99% O<sub>2</sub>). For the hyperoxia treatment, the chamber was flushed  
278 to saturation with 99% O<sub>2</sub> for 30 min each day for 15 days. Before doing the O<sub>2</sub> treatment  
279 every day the chambers were open to renew the air and remove the moisture, and when  
280 necessary they were irrigated. A similar procedure was performed in the control chambers but  
281 flushing the chambers with air instead of O<sub>2</sub>. In addition, the hyperoxia treatment was  
282 performed with trays containing intact and peeled explants (outer scales removed).

283

284 *Electrode pathway by micro-computed tomography*

285 The buds used to determine the internal pO<sub>2</sub> were preserved in FPA solution (10% (v/v) 37%  
286 formalin; 5% (v/v) propionic acid; 50% (v/v) 70% ethanol; 35% (v/v) DI water) at 4 °C. The  
287 samples were subsequently incubated overnight in 1% iodine +2% potassium iodide solution  
288 (IKI) in PBS prior to  $\mu$ CT scanning. Buds were then placed in a 5 mm diameter sealed plastic  
289 straw in PBS and scanned at 40 kV and 66  $\mu$ A using a  $\mu$ CT system (Versa 520 XRM, Zeiss)  
290 running Scout and Scan software (v10.6.2005.12038, Zeiss). A total of 2501 projections were  
291 collected over 360°, each with a 5 s exposure. 2x binning was used to achieve a suitable  
292 signal to noise ratio and 0.4x optical magnification was used to achieve an isotropic voxel  
293 resolution of 7.9  $\mu$ m. An LE1 source filter was also applied. Raw data were reconstructed  
294 using XMReconstructor software (v10.7.3679.13921, Zeiss) following a standard center shift  
295 and beam hardening correction. The standard 0.7 kernel size recon filter setting was also  
296 used. Avizo (v8.1.1, FEI) software was used to obtain orthogonal slices through the data in  
297 the same plane as the electrode pathway. Images were then taken into Adobe Photoshop  
298 Elements 15 where the the pO<sub>2</sub> profiles were mapped onto the electrode pathway. Pixel  
299 density was determined using the Line probe tool of Avizo 8.1, as a measure of tissue  
300 density. In particular, two lines were used, one just above the path and the other just below  
301 the path. The average of the intensities was used to estimate the density of tissue that the  
302 probe penetrated.

303

304 **Results**

305 *Physiological experiments on the roles of light and oxygen during bud burst*

306 The influence of light on the rate of bud burst was evaluated in the presence or absence of  
307 hydrogen cyanamide (HC), a commonly used agent to synchronise bud burst. The data

308 demonstrate an interaction between light and HC, whereby the influence of light was greater  
309 in the absence of HC (Fig. 1A,B). HC alone had a considerable effect of increasing the rate of  
310 bud burst, accelerating the rate to achieve 50% bud burst from *c.* 28 to 15 days (in light). In  
311 the absence of both light and HC, bud burst did not reach 50% within the experimental  
312 timeframe. However, light was not an obligate requirement for bud burst. For subsequent  
313 experiments we chose to work with HC-treated buds because bud emergence was more  
314 predictable than in untreated buds. Where exceptions occurred, they were noted.

315

316 Bud respiration was determined in the presence and absence of light (DL, D) as CO<sub>2</sub>  
317 production and O<sub>2</sub> consumption during the first week of growth (0, 48, 96 and 168h). In both  
318 light conditions at 168h, the CO<sub>2</sub> release and O<sub>2</sub> consumption were greater than at 0h (Fig.  
319 1C,D), indicating the resumption of metabolic activity irrespective of the presence of light.  
320 Although minor differences in gas exchange were observed between the DL and D  
321 conditions, these were not significant and not as apparent as previously observed (Meitha *et*  
322 *al.*, 2018).

323

324 Assuming that the outer scales of grapevine buds might act as a barrier to O<sub>2</sub> diffusion, we  
325 analysed the effect of removing the outer scales on bud burst. Peeled buds were able to burst  
326 earlier than unpeeled buds, as previously observed in var. Zinfandel (Fig. 2A; Iwasaki and  
327 Weaver, 1977), suggesting that the scales of grapevine buds delay bud burst. Initially we  
328 considered two possible explanations for the acceleration of the bud burst: an increased  
329 incidence of light may stimulate bud burst; or, an improved gas exchange may promote  
330 oxygenation, relieving a limitation to respiration. To identify whether light was playing a  
331 role, we performed the same experiment in absence of light (D), showing a delay in bud burst  
332 relative to light condition (DL) of both control and peeled buds (Fig. 2A,B). The difference  
333 however between peeled and control was not suppressed by the absence of light. This refutes  
334 the argument that light incidence was primarily responsible for the acceleration of bud burst  
335 in peeled buds. We also tested the rate of bud burst of intact buds in a hyperoxic  
336 environment, but found no difference to normoxic conditions, and the difference between  
337 peeled and control was not suppressed (Fig. 2C). Together this suggests that the inhibitory  
338 effect of the outer scale on growth is other than reducing light or oxygen perception. This is  
339 considered further in the discussion section.

340

341 *The role of vascular development during bud burst and the effect of light*

342 We then investigated the vascular development of the intact buds visually and by micro-  
343 computed tomography ( $\mu$ CT), to address whether light influenced the resumption of vascular  
344 transport. From the  $\mu$ CT data, vascular development was apparent over the time course  
345 however the contrast agent was transported even at 0h) demonstrating that the vascular tissue  
346 is already functional, at least, to transport water and minerals (Fig. 3A and Movie S1 show  
347 the uptake of the contrast agent in a 3D bud structure). The contrast agent used here, was  
348 determined to be ideal for marking vascular tissue (Wang *et al.*, 2017). On the grounds that  
349 the symplast was shown to be regulated during the dormancy transitions in poplar (Rinne *et al.*,  
350 2011), we investigated whether the apoplast is also regulated during the resumption of  
351 bud growth, using apoplastic dyes which are larger than the contrast agent used for  $\mu$ CT and  
352 more reflective of macromolecules transported in the phloem and xylem. Here, dye  
353 movement was not evident until after the swollen stage (168h, 7 days), when bud break was  
354 already initiated (Fig. 3B,C). The ability of the apoplast to transport the dyes was observed  
355 earlier in the DL condition, despite the fact that D-grown buds had reached a similar degree  
356 of bud swell over the same time (see Fig. S1 and S2). This demonstrates that the aperture of  
357 the apoplast between the bud and the cane is rapidly regulated during the initiation of bud  
358 burst and likely to restrict uptake to water and small molecules until after the initiation. It also  
359 suggests that the difference in the rates of bud burst observed between D- and DL-grown  
360 buds results, in part, from more rapid apoplastic development in the DL condition (Fig. 1A).  
361 In addition, we observed that the uptake of acid fuchsin was more rapid and extensive than of  
362 eosin Y.

363

364 Considerable evidence shows that the xylem pressure builds and the sap becomes enriched  
365 with simple sugars and phytohormones, particularly cytokinins, in the weeks prior to bud  
366 burst (Skene and Antcliff, 1972; Sperry *et al.*, 1987; Maurel *et al.*, 2004; Bonhomme *et al.*,  
367 2010). The data described above indicate these smaller molecules would be capable of being  
368 delivered to the meristematic cells of the bud via the apoplast, but not larger oligosaccharides,  
369 peptides or macromolecules which may play signalling roles. Thus we performed a bud burst  
370 experiment isolating the buds from the cane and planting them on Petri dishes containing  
371 MS-agar-PPM. Considering the beneficial effect of removing the scales on bud burst we used  
372 intact buds and peeled buds, where the scale was carefully removed. We observed that  
373 excised buds from late September (2 weeks prior to natural bud burst) could initiate bud  
374 burst, since the primary buds were already swollen at 12 days in peeled buds (Fig. S3). Intact

375 buds were also swollen at 12 days (not statistically significant from control). Despite the  
376 swelling, the growth was limited and the buds were unable to sustain leaf emergence (bud  
377 burst *sensu stricto*), possibly due to nitrogen, phosphorus or other mineral deficiency,  
378 otherwise supplied through the transpiration stream from the cane.

379

380 Since the transpiration rate in a later stage of bud burst should be faster than in an earlier  
381 stage, it is plausible that the greater uptake of dyes at later stages is due to the greater  
382 transpiration, rather than a change in apoplastic connectivity. Thus, we performed an  
383 experiment comparing bursting buds with 0h buds that had been peeled in order to increase  
384 the dehydration of the bud, and therefore the uptake of the solution. Our results demonstrate  
385 that in an intact bursting explant (216h), the dye penetrated to the top of the bud within 3h of  
386 incubation (Fig. S4A). Nevertheless, in a 0h peeled bud, even after 72h of incubation, the dye  
387 could not penetrate the buds (Fig. S4A). This demonstrates that the observations of Fig. 3B,C  
388 are methodologically supported, and that prior to bud burst, bulk flow driven by the xylem  
389 pressure, or diffusion would still be restricted.

390

391 Following this series of experiments, we conclude that neither light incidence, nor long  
392 distance signals arising from the mother vine are essential for the resumption of  
393 organogenesis leading to bud burst.

394

#### 395 *Determining the tissue-specific oxygen levels in a perennial bud*

396 In order to further investigate the roles of light and O<sub>2</sub> on the course and coordination of bud  
397 burst, we assessed the internal tissue oxygen status (pO<sub>2</sub>) through bud burst in the DL and D  
398 buds. These data were consistent with our previous studies, showing progressive spatio-  
399 temporal oxygenation during bud burst (Fig. S5; Meitha *et al.*, 2015; 2018). While a slight  
400 decrease in the pO<sub>2</sub> over the first 48h and a marginal increase after 48h was observed, the pO<sub>2</sub>  
401 differences we had previously observed between the DL and D conditions (Meitha *et al.*,  
402 2018) were not as apparent. These data were measured in complete darkness (assayed  
403 condition), however, the presence of chlorophyll (Meitha *et al.*, 2018) and light-responsive  
404 gene expression (Signorelli *et al.*, 2018) during the initiation of bud burst suggests sufficient  
405 light does penetrate and promote light signalling and may enable photosynthesis. Thus, we  
406 re-examined the pO<sub>2</sub> profiles in the presence of light (assayed condition), with the  
407 expectation that the presence of light promotes internal oxygenation via photosynthesis and  
408 may be related to the more rapid bud burst observed when light is present in the growth

409 environment. This experiment was performed only in 168h buds, which were more likely to  
410 have developed a photosynthetic capacity. The presence of light during measurement did not  
411 significantly increase the internal pO<sub>2</sub> profile in buds grown in the presence (DL) or absence  
412 (D) of light (Fig. S6A), although we observed that a small increase in pO<sub>2</sub> in the peripheral  
413 region of the bud (depth 0-200 μm) in the DL condition (>15 kPa *cf* D <10 kPa; Fig. S6B).

414

415 As previously observed, the spatial variance among the pO<sub>2</sub> data was considerable (Fig. S5),  
416 which we interpret to be due to the considerable tissue heterogeneity within and between  
417 biological replicates, confounding the resolution of differences in oxygenation due to  
418 treatment effects. In order to establish this hypothesis, μCT were performed on individual  
419 buds after assaying the internal pO<sub>2</sub> profile (168h D and DL). In the μCT the electrode path  
420 was clearly visible, enabling us to overlap the pO<sub>2</sub> profile with the images (Fig. 4). As the  
421 profile supported our hypothesis, a line probe, reporting the intensity of the pixels, was used  
422 to estimate the density of tissue just above and below the electrode pathway. The pO<sub>2</sub> profile  
423 correlated well with the internal structure of the bud, and particularly that the sudden decline  
424 in pO<sub>2</sub> as the probe entered bract structures, while the pO<sub>2</sub> of the regions of the trichome hairs  
425 was elevated (Fig. 4). This analysis also clearly illustrated that the pO<sub>2</sub> of the meristematic  
426 core of the bud (between 2000-2400 μm depth) was elevated following the initiation of bud  
427 burst.

428

429 Exploring the structural context further, we then determined the tissue porosity and moisture  
430 content, two variables known to affect O<sub>2</sub> diffusion, of the scales, the trichomes and the green  
431 tissue of grapevine buds (Fig. 5A). These variables were first determined by weight and  
432 volume data. The greatest porosity (% gas spaces per unit tissue volume) was found in the  
433 trichomes, 77%, followed by 30% for the outer scales and 12% for the green tissue. Humidity  
434 (% water per unit tissue weight) was the lowest for the trichomes (14%), 18% for the scales  
435 and 41% for the green tissue. We further investigated the porosity analyzing the structural  
436 data obtained by μCT, being able to also evaluate the porosity of the base of the bud, the  
437 trichome, bracts and outer scales (Fig. 5B). The values were 85-88% for the trichomes, 37-  
438 38% for the outer scale, 5-6% for the bracts, and 8-10% for the base, at 0h and 168h (Fig.  
439 5C). Overall the results from the structural images correlated well with the other results.  
440 However, the differences between the tissues were enhanced. No statistically significant  
441 differences were observed between 0h and 168h. Despite of the higher moisture and lower  
442 porosity of the inner scales, the structure of the bud and the high porosity observed (Fig. 5C)

443 ensures that the meristem is well aerated in mature buds. On the other hand, the O<sub>2</sub> profiles  
444 (Fig. 4, S5) suggests that the vascular tissue also contributes to the O<sub>2</sub> concentration within  
445 the bud and not only the atmospheric O<sub>2</sub> should be considered. Finally, the relatively high  
446 porosity of the outer scale determined by both methodologies suggests it is a weak barrier for  
447 oxygen.

448

449 Together these data clearly demonstrate that the pO<sub>2</sub> in the bud is spatially regulated, and that  
450 despite the porosity constraints, the meristematic core of the bud (primary meristem) is  
451 preferentially oxygenated during bud burst. This oxygenation does not apparently evolve  
452 from *in situ* photosynthesis.

453

#### 454 *Determination of the molecular exclusion size in buds*

455 Generally speaking, the isolation of the bud from the cane during dormancy has been long  
456 considered. However, there are no data reporting quantifiable measures of this isolation, such  
457 as, the molecular exclusion size of buds. Considering that CsI was transported in 0h buds and  
458 that in grapevine dormant buds rhodamine green was shown to be transported (Jones *et al.*,  
459 2000), the information of acid fuchsin and eosin Y can be used to precisely determine the  
460 pore size of the apoplast in grapevine prior to bud burst (Fig. S7). In order to do this, the  
461 molecules of rhodamine green, acid fuchsin and eosin Y were computationally modelled in  
462 the associated (neutral) and dissociated forms. The molecular volume, determined by the  
463 electron density of the optimised structures, was greater for eosin Y than for the other  
464 molecules (Fig. 6A). Indeed, the molecular volume (Fig. S7) positively correlated with the  
465 molecular weight of the molecules, being the lowest for rhodamine green (Fig. S7). The  
466 charges and the electrostatic potential of these molecules were also evaluated to understand if  
467 their different mobilities are due to different physical-chemical properties. In the associated  
468 form, the charges and dipole moment of rhodamine green and eosin Y are quite similar, with  
469 the partial charges homogeneously distributed through the molecules (Fig. 6B). In the case of  
470 neutral acid fuchsin, more extreme partial charges were localised towards the phosphate  
471 groups, however the dipole moment was also small due to the symmetry of the molecule (Fig.  
472 6A). Similar observations were found in the dissociated forms, with the regards to the fact  
473 that the anionic form of eosin Y had a much greater dipole moment (Fig. 6A). The fact that  
474 acid fuchsin showed more extreme partial charges would contribute to the interaction with  
475 the water molecules.

476



477 More extreme electrostatic potentials were found in rhodamine green and acid fuchsin than in  
478 eosin Y (Fig. 6C), indicating that these two molecules are more susceptible to react with  
479 different nucleophiles and electrophiles than eosin Y. Since acid fuchsin and eosin Y are both  
480 anions (charge -2) and did not show contrasting physico-chemical properties, we can attribute  
481 the differences in mobility observed (Fig. 3B,C) to their difference in size. Hence, to better  
482 estimate the required size to transport the molecules through the plant, the solvent accessible  
483 surface for both molecules in the ionic form was modelled (Fig. 7), and the lowest area that  
484 they required to be transported was estimated. Our results demonstrated that eosin Y requires  
485 a bigger pore area to pass through (Fig. 7). Considering that these soluble molecules will  
486 require at least one layer of water hydration shell ( $\sim 3.5 \text{ \AA}$ , Laage *et al.*, 2017), the diameter of  
487 the pore should be increased by 0.7 nm. Hence, the 1.5 nm estimated length of these  
488 molecules would be increased to  $\sim 2.2$  nm when having one water layer. As we demonstrated  
489 that these dyes cannot enter to the bud prior to bud burst, but considering that rhodamine  
490 green can, we conclude that the molecular exclusion size at the base of the bud is about 2.1  
491 nm.

492

## 493 **Discussion**

494 An increasing number of studies have added to the literature on signalling and transcriptional  
495 changes in bud quiescence, dormancy and outgrowth/ burst. Here we have returned to more  
496 classical physiological experiments to establish an improved platform of knowledge to which  
497 the gene expression and signalling studies can relate, including non-cell autonomous signals  
498 such as proteins, mRNAs and miRNAs, and the role of molecular oxygen.

499

500 *The apoplast pore size of quiescent grapevine buds restricts passive transport to water and*  
501 *small molecules.*

502 In the weeks prior to bud burst in woody perennials, xylem pressure builds to extreme levels  
503 and becomes enriched in phytohormones and simple sugars (Skene and Antcliff, 1972;  
504 Sperry *et al.*, 1987). It has been shown that the symplast is gated during this transition, in a  
505 manner dependent on temperature- and gibberellic acid (GA)-regulated glucanases (Rinne *et al.*,  
506 2011). However, given the extreme pressure in the xylem, the apoplast could be a  
507 considerable pathway for long range signals from the mother vine/tree, which trigger bud  
508 burst. Experiments here show that the aperture of the apoplast would constrain transport to  
509 small molecules such as simple sugars, and may even restrict glycosylated phytohormones.

510



511 The apoplastic transport is limited by the pores formed in the cellulose/hemicellulose fiber  
512 structure. Depending on the tissue, the limiting diameter of these pores can vary. In hair cells  
513 of *Raphanus sativus* roots and fibres of *Gossypium hirsutum*, the pore size was as small as 3.5  
514 to 3.8 nm, while in the parenchyma cells of the leaves of *Xanthium strumarium* and  
515 *Commelina communis* they were determined to be between 4.5 to 5.2 nm (Carpita *et al.*,  
516 1979). In citrus leaves, the size exclusion limits to move through the cell wall and into the  
517 phloem was estimated to be between 4.5 to 5.4 nm (Etxeberria *et al.*, 2016). These values are  
518 much higher than the 2.1 nm diameter pore determined here in buds, suggesting that  
519 quiescent perennials buds are quite well-isolated. As a previous report demonstrated that  
520 rhodamine green, which is slightly smaller than acid fuchsin (Fig. S7), is able to pass via the  
521 apoplast into the bud (Jones *et al.*, 2000), smaller molecules should also. This would include  
522 mono- and di-saccharides, such as glucose and sucrose, and phytohormones, such as  
523 ethylene, salicylic acid, abscisic acid (ABA), jasmonic acid and GA. Xylem turgor pressure  
524 builds considerably prior to bud burst and seasonal dynamics in cytokinin (CK), sucrose and  
525 hexose content of the xylem, and transport to the bud have been correlated with bud burst in a  
526 number of woody perennials (Skene and Antcliff, 1972; Sperry *et al.*, 1987; Maurel *et al.*,  
527 2004; Bonhomme *et al.*, 2010). For example, apical buds of the acrotonic species walnut  
528 became capable of passive and active transport of sucrose just prior to bud burst, and the  
529 transport was highly sensitive to temperature (Bonhomme *et al.*, 2010). Cell wall invertase  
530 (CWI) may play a key role in mediating the transport of sugars through the apoplast, since  
531 sucrose mobility will be more limited than for hexoses. The CWI has demonstrated functions  
532 in sink strength and regulating developmental transitions and shoot architecture (Heyer *et al.*,  
533 2004). Indeed, CWI activity was induced shortly before bud break in buds of peach trees  
534 (Maurel *et al.*, 2004), and gene expression of a vacuolar invertase was rapidly induced at the  
535 onset of bud burst in grapevine, together with sucrose synthases (Meitha *et al.*, 2018).  
536 Bonhomme *et al.* (2010) showed that by early spring the sugars were transported from the  
537 bark and xylem to the bud, at least one month prior to bud burst. Our results in excised buds  
538 collected in early spring, indicate that the *de novo* transport of sugars and phytohormones  
539 from the cane is not the trigger of bud burst. Rather, that the increase in temperature within  
540 the bud is important to enable catabolism and secondary-active transport of sugars within the  
541 bud, resulting in an increase in sink strength, which triggers a commitment to bud burst.

542

543 The fact that the pore size of the apoplastic connection is smaller in buds than in roots and  
544 leaves of other plants suggests that the isolation of the bud is key to enable desiccation and

545 metabolic quiescence, and to avoid premature rehydration of the bud, which may result in  
546 precocious bud burst. A relevant comparison can be made to the seed coat (testa), which is  
547 known to protect the plant embryo and can restrict the transport of molecules small as  $2.8 \pm$   
548  $1.2$  nm (Kurepa *et al.*, 2010). When the seeds are imbibed, the mucilage of the epidermal  
549 cells is hydrated, rupturing the cell wall (Kurepa *et al.*, 2010). Similarly, we observed that  
550 morphological changes to bring about an increase in the pore size and allow the transport of  
551 these dyes must occur during the early stages of bud burst. Our evidence suggests that pore  
552 size increases to more than 2.1 nm over the course of bud burst to allow the diffusion of eosin  
553 Y. Importantly, here we have used computational chemistry to model the structure of the dyes  
554 at the quantum level, rather than a broadly estimated size of the molecule, as commonly used  
555 in studies reporting transport of nano-molecules. This information itself is highly valuable  
556 given that these dyes are widely employed across the life sciences to evaluate vascular  
557 transport.

558

#### 559 *Light accelerates the reactivation of vascular tissue between the cane and the bud*

560 Light is an absolute requirement for bud burst (outgrowth) in many species, including rosa  
561 spp. and pea (Leduc *et al.*, 2014). Here we showed that grapevine buds (post-dormant) have a  
562 facultative requirement for light, which accelerates vascular development and the rate of bud  
563 burst, but not the final proportion of buds burst. This effect was not due to a more developed  
564 state of the buds grown in DL condition, in fact, less developed DL buds showed apoplastic  
565 connectivity when more developed D buds did not (Fig. 3C, S1A,B and S2B). Our data and  
566 that of Bonhomme *et al.* (2010) strongly indicate that the xylem, rather than phloem being the  
567 source of metabolites for the emerging bud. In this case, re-activation of phloem as a  
568 consequence of bud burst (Esau, 1948) is secondary and not primarily related to bud burst.  
569 The local hydrolysis of polysaccharides in the cell wall should be responsible for the increase  
570 of porosity during early bud burst. In fact, upon inspecting gene expression data from a  
571 previous study (grapevine buds grown 72h and 144h in D and DL condition, data available at  
572 NCBI BioProject PRJNA327467, <http://www.ncbi.nlm.nih.gov/bioproject/327467>; Signorelli  
573 *et al.*, 2018), we found that three genes coding for CELLULOSE SYNTHASE  
574 (*VIT\_02s0025g01910*, *VIT\_02s0025g01980* and *VIT\_12s0059g00960*) and one coding for a  
575 CELLULASE (*VIT\_19s0014g02870*) were downregulated by light, indicating a reduced  
576 metabolism of cellulose in light. Furthermore, a gene coding for EXPANSIN was upregulated  
577 by light. EXPANSINs are believe to play important roles in meristem functions, participating  
578 in the cell wall loosening (Cosgrove, 2000).

579

580 Light quality also affects bud burst in rose, in particular white, blue and red lights promote  
581 bud burst, while FR light does not, and the bud itself plays an important role in light  
582 perception (Girault *et al.*, 2008; Abidi *et al.*, 2013). In grapevine, we recently provided  
583 evidence suggesting that CRY photoreceptors play a role in promoting a photomorphogenic  
584 response, which points to the importance of blue light (Signorelli *et al.*, 2018). We are not  
585 aware of any detailed studies of the light quality responses of grapevine buds.

586

587 *The meristematic zone of buds is preferentially oxygenated during bud burst*

588 Several studies, particularly in the presence of HC, have identified patterns that implicate the  
589 development of oxidative stress- and hypoxic response-syndromes, which precede the  
590 activation of glycolysis, the pentose phosphate pathway and fermentation, as fundamental  
591 events that enable bud burst (Ophir *et al.*, 2009; Vergara *et al.*, 2012). More recently, we  
592 observed that even in the absence of HC or other stress, tissue oxygenation and the  
593 expression of conserved hypoxia-responsive genes is acute and highly regulated during the  
594 first 24h at growth-permissive temperatures (Meitha *et al.*, 2018). Thereafter gene expression  
595 became more responsive to light and energy cues (Signorelli *et al.*, 2018). Our earlier data  
596 also suggested tissue-specific oxygenation of the meristematic core (primary bud) after 24h,  
597 however the resolution of these data was not as clear as previously seen in other organs such  
598 as roots and fruit. The use of  $\mu$ CT data to map the path of the  $pO_2$  electrode here provides  
599 irrefutable evidence that the meristematic core is oxygenated during bud burst. The porosity  
600 data suggest that atmospheric  $pO_2$  (*ca.* 21 kPa) should be sufficient to oxygenate at least the  
601 peripheral regions and tissues of the bud. A recent study demonstrated that lenticels in the  
602 pedicel (stalk) of grapevine berries were a functional source of oxygen during ripening,  
603 linking genetic differences in this capacity to cell death and berry disorders (Xiao *et al.*,  
604 2018). If the oxygenation of the meristem also requires oxygen from the vascular tissue,  
605 lenticels on the surface of the cane adjoining the bud may play a similar role during bud  
606 burst, however that these pathways may be occluded until bud burst has commenced and  
607 apoplastic pathways develop.

608

609 *Signals to initiate bud burst are perceived within the bud*

610 Dormant or post-dormant perennial buds are thought to be uncoupled from apical dominance,  
611 as there is no growing shoot and the symplastic and apoplastic connections are gated. As no

612 vascular changes were observed within the bud (Fig. 3A), and those changes observed  
613 between the bud and the cane were largely subsequent to bud burst (Fig. 3B,C, S1 and S2),  
614 we evaluated whether buds excised from the cane would be competent to establish bud burst.  
615 Our results suggested that the primary perception and signal cascade to initiate bud burst  
616 arises within the bud and are independent of *de novo* transport of phytohormones or other  
617 mobile elements from the cane. In fact, very recently, the induction of *in situ* catabolism of  
618 ABA was demonstrated to be essential for bud break in grapevine (Zheng *et al.*, 2018).  
619 Moreover, the authors showed that the transgenic expression of the ABA catabolic enzyme  
620 VvA8H-CYP707A4 resulted in enhancement of bud break in grapevine, and reduced apical  
621 dominance (Zheng *et al.*, 2018). Also recently, a transcriptomic study on *Prunus mume*  
622 suggested that low temperature results in the up-regulation of C-repeat binding factor genes,  
623 which directly promotes six dormancy associated MADS-box genes to establish dormancy.  
624 After prolonged period of cold and the subsequent rise of temperature, a decrease of the  
625 expression of these families of genes induce GA-signalling, repressing FLOWERING  
626 LOCUS T, and enabling bud burst (Zhang *et al.*, 2018).

627

628 Our data are also consistent with conclusions from other perennials plants, such as poplar,  
629 whereby the *FLOWERING LOCUS T1* (*FT1*) and *CONSTANS* (*CO*) homologues are induced  
630 within the bud by chilling, presumably synthesised in the embryonic leaves (Rinne *et al.*,  
631 2011). Subsequent to transition to growth-permissive temperatures and long days, triggering  
632 the onset of bud burst, *FT1* expression was repressed while *CO* was elevated further. These  
633 effects were shown to be dependent on GA, and the activation of glucan hydrolases to resume  
634 symplastic communication with the cane (Rinne *et al.*, 2011). Our recent transcriptome data  
635 in bursting grapevine buds also highlighted the elevated expression of GA signalling genes  
636 and those involved in core meristem functions within the first 24h transition from 4 °C to 20  
637 °C, irrespective of light (Meitha *et al.*, 2018). By contrast, at later stages, CK signalling was  
638 the prominent phytohormone signature, and demonstrably light-dependent (Signorelli *et al.*,  
639 2018). Although light and particularly photoperiod dependencies vary between poplar and  
640 grapevine, these data strong support previous conclusions that temperature, rather than light  
641 is the primary trigger for post-dormant bud burst in perennials.

642

643 Together these data suggest that bud burst in grapevine is initiated within the bud, following  
644 sufficient hydration and activation of internal ABA- and GA-dependent pathways, but  
645 independent of macromolecule transfer from the corpus. This enables an increase in

646 metabolic activity, creating a sink and potentially signals for the resumption of vascular  
647 development.

648

#### 649 *Outer scales of grapevine vine buds may play a role in controlling bud burst*

650 In the present work, we showed that removing the outer scales of grapevine buds accelerates  
651 bud burst (Fig. 2A). As the effect of removing the scales was independent of light and oxygen  
652 availability (Fig. 2), we propose that the scale may facilitate biochemical repression of  
653 growth, and that HC in particular, and light more gradually, attenuate the repressor or  
654 promote its degradation. This is consistent with the biology of some seeds, where for example  
655 in legume seeds, the seed coat supplies the zygote with ABA (Smýkal *et al.*, 2014), and in  
656 *Arabidopsis*, a thick cutin layer surrounding the endosperm participates in GA- and ABA-  
657 dependent regulation of germination (De Giorgi *et al.*, 2015). Genetic studies showed that  
658 lines deficient in cutin biosynthesis were unable to block expansion of endosperm cells under  
659 low GA conditions. To date, studies on the regulatory role of glucans and cutins has focussed  
660 on vascular and symplastic conductance. Nevertheless, evidence from other studies in buds  
661 are consistent with the GA-dependent glucanase activity in regulating dormancy (Rinne *et al.*,  
662 2011), and this may extend to a function of a suberin layer surrounding grapevine buds, either  
663 within the outer scale or as a cicatrix-like layer between the base of the dead scale and the  
664 living bud. The primary candidate inhibitor is ABA, which was shown to inhibit dormancy  
665 release in grapevine (Zheng *et al.*, 2015, 2018). In a similar way we speculate that the bud  
666 scale could provide ABA to the bud. In some agreement, Iwasaki and Weaver (1977)  
667 showed that in grapevine bud scales, ABA rapidly increased during storage at 0 °C, reaching  
668 a maximum between the second and fourth week, and then gradually declining to control  
669 values at 12 weeks. Similarly, when HC was applied to the buds, the ABA levels rapidly  
670 increased in the scale but declined to control levels within two weeks (Iwasaki and Weaver,  
671 1977).

672

#### 673 **Conclusions**

674 We conclude that the perception of environmental triggers to initiate bud burst arise within  
675 the bud, triggering metabolic and signalling activity *in situ*, which creates a sink and  
676 potentially basipetal signals for the resumption of vascular development. We also conclude  
677 that the pO<sub>2</sub> patterns of buds, observed previously and here, correlated with the internal  
678 structure of the bud, in a way that the lower pO<sub>2</sub> content is observed in the bract structures,  
679 whereas the pO<sub>2</sub> of the regions of the trichome hairs and the meristematic core is elevated

680 rapidly once bud burst is initiated. This explains the variance in  $pO_2$  within and between buds  
681 seen in this and previous studies. Given the increasingly important context of  $pO_2$  in plants  
682 and the use of oxygen-sensitive electrodes, these data should serve as caution to ensure the  
683 exact path is known. We also conclude that the growth repressor role of the outer scale of  
684 grapevine buds is not due to a simple physical function such as light or oxygen barrier.  
685 Finally, the smaller pore size of the apoplastic milieu of grapevine buds with respect to other  
686 plant organs allow us to conclude that the conductance of the apoplast is regulated during  
687 quiescence, although the mechanisms remain unexplored.

688

## Supplementary data

**Fig. S1:** Apoplastic connectivity in July buds at 0, 48, 96, 168, 216, 264, and 432h in D and DL.

**Fig. S2:** Apoplastic connectivity in August buds at 168, 216, and 264 in D and DL.

**Fig. S3:** Growth of isolated buds on agar.

**Fig. S4:** Apoplastic connectivity at different incubation times in 0h peeled buds and bursting buds to evaluate the effect of bud transpiration.

**Fig. S5:** Effect of light (growth condition) on internal O<sub>2</sub> pressures at 0, 48, 96, and 168h in D and DL.

**Fig. S6:** Effect of light (assay condition) on measurements of internal O<sub>2</sub> pressures.

**Fig. S7:** Schematic comparison of Eosin Y, Acid fuchsin and Rhodamine structures and molecular weights, to understand the logic employed to determine the molecular exclusion size.

**Movie 1:** Uptake of Iodine by grapevine bud at 168h.

## Acknowledgments

We thank Dr. Laura E. Coitiño (UdelaR, Uruguay) for her generous help in setting up the computational facilities at the School of Agronomy (UdelaR) and providing the software to perform the computational modelling. The authors acknowledge the facilities and the scientific and technical assistance of the Australian Microscopy & Microanalysis Research Facility at the Centre for Microscopy, Characterisation & Analysis, UWA, a facility funded by the University, State and Commonwealth Governments. This research was funded by Australian Research Council grants to MJC (LP0990355, DP150103211).

**Author contributions:** MJC and SS conceived the study. SS carried out biological experiments, performed all physiological analysis and molecular modelling, JS, ZW, and PV performed and assisted with  $\mu$ CT, DH assisted with respiration measurements. SS analysed the experiments. JAC and MJC advised on experimental design. SS and MJC wrote the manuscript. All authors approved the manuscript.



## References

- Abidi F, Girault T, Douillet O, Guillemain G, Sintes G, Laffaire M, Ahmed H Ben, Smiti S, Huché-Théliér L, Leduc N.** 2013. Blue light effects on rose photosynthesis and photomorphogenesis. *Plant Biology* **15**, 67–74.
- Alleweldt G, Hofacker W.** 1975. Influence of environmental factors on bud burst, flowering, fertility and shoot growth of vines. *Vitis* **14**, 103–115.
- Aloni R, Peterson CA.** 1991. Seasonal changes in callose levels and fluorescein translocation in the phloem of *Vitis vinifera* L. *IAWA Journal* **12**, 223–234.
- Aloni R, Peterson C a.** 1997. Auxin promotes dormancy callose removal from the phloem of *Magnolia kobus* and callose accumulation and earlywood vessel differentiation in *Quercus robur*. *Journal of Plant Research* **110**, 37–44.
- Aloni R, Raviv A, Peterson C.** 1991. The role of auxin in the removal of dormancy callose and resumption of phloem activity in *Vitis vinifera*. *Canadian Journal of Botany* **69**, 1825–1832.
- Beauvieux R, Wenden B, Dirlewanger E.** 2018. Bud Dormancy in Perennial Fruit Tree Species: A Pivotal Role for Oxidative Cues. *Frontiers in Plant Science* **9**, 1–13.
- Bonhomme M, Peuch M, Ameglio T, Rageau R, Guilliot A, Decourteix M, Alves G, Sakr S, Lacoïnte A.** 2010. Carbohydrate uptake from xylem vessels and its distribution among stem tissues and buds in walnut (*Juglans regia* L.). *Tree Physiology* **30**, 89–102.
- Carpita N, Sabulase D, Montezinos D, Delmer DP.** 1979. Determination of the Pore Size of Cell Walls of Living Plant Cells. *Science* **205**, 1144–1147.
- Cartechini A, Palliotti A.** 1995. Effect of shading on vine morphology and productivity and leaf gas exchange characteristics in grapevines in the field. *American Journal of Enology and Viticulture* **46**, 227–234.
- Considine MJ, Considine JA.** 2016. On the language and physiology of dormancy and quiescence in plants. *Journal of Experimental Botany* **67**, 3189–3203.
- Cosgrove DJ.** 2000. Loosening of plant cell walls by expansins. *Nature* **407**, 321–326.
- Esau K.** 1948. Phloem structure in the grapevine and its seasonal changes. *Hilgardia* **18**, 217–296.
- Etxeberria E, Gonzalez P, Bhattacharya P, Sharma P, Ke PC.** 2016. Determining the size exclusion for nanoparticles in citrus leaves. *HortScience* **51**, 732–737.
- Frisch MJ, Trucks GW, Schlegel HB, et al.** 2009. Gaussian 09.
- De Giorgi J, Piskurewicz U, Loubery S, Utz-Pugin A, Bailly C, Mène-Saffrané L, Lopez-Molina L.** 2015. An Endosperm-Associated Cuticle Is Required for Arabidopsis Seed



- Viability, Dormancy and Early Control of Germination. *PLoS genetics* **11**, e1005708.
- Girault T, Bergougnoux V, Combes D, Viemont JD, Leduc N.** 2008. Light controls shoot meristem organogenic activity and leaf primordia growth during bud burst in *Rosa* sp. *Plant, Cell and Environment* **31**, 1534–1544.
- Heyer AG, Raap M, Schroeer B, Marty B, Willmitzer L.** 2004. Cell wall invertase expression at the apical meristem alters floral, architectural, and reproductive traits in *Arabidopsis thaliana*. *Plant Journal* **39**, 161–169.
- Iwasaki K, Weaver RJ.** 1977. Effects of chilling, calcium cyanamide, and bud scale removal on bud break, rooting, and inhibitor content of buds of ‘Zinfandel’ grape (*Vitis vinifera* L.). *Journal of the American Society for Horticultural Science* **102**, 584–587.
- Jones KS, McKersie BD, Paroschy J.** 2000. Prevention of ice propagation by permeability barriers in bud axes of *Vitis vinifera*. *Canadian Journal of Botany-Revue Canadienne De Botanique* **78**, 3–9.
- Kurepa J, Paunesku T, Vogt S, Arora H, Rabatic BM, Lu J, Wanzer MB, Woloschak GE, Smalle JA.** 2010. Uptake and distribution of ultra-small anatase TiO<sub>2</sub> alizarin red s nanoconjugates in *Arabidopsis thaliana*. *Nano Letters* **10**, 2296–2302.
- Laage D, Elsaesser T, Hynes JT.** 2017. Water Dynamics in the Hydration Shells of Biomolecules. *Chemical Reviews* **117**, 10694–10725.
- Lavee S, May P.** 1997. Dormancy of grapevine buds - facts and speculation. *Australian Journal of Grape and Wine Research* **3**, 31–46.
- Leduc N, Roman H, Barbier F, Péron T, Huché-Théliér L, Lothier J, Demotes-Mainard S, Sakr S.** 2014. Light Signaling in Bud Outgrowth and Branching in Plants. *Plants* **3**, 223–250.
- Maurel K, Leite GB, Bonhomme M, Guillot A, Rageau R, Pétel G, Sakr S.** 2004. Trophic control of bud break in peach (*Prunus persica*) trees: A possible role of hexoses. *Tree Physiology* **24**, 579–588.
- May P, Clingeffer P, Brien C.** 1976. Sultana (*Vitis vinifera* L.) canes and their exposure to light. *Vitis* **14**, 278–288.
- Meitha K, Agudelo-Romero P, Signorelli S, Gibbs DJ, Considine JA, Foyer CH, Considine MJ.** 2018. Developmental control of hypoxia during bud burst in grapevine. *Plant Cell and Environment* **41**, 1154–1170.
- Meitha K, Konnerup D, Colmer TD, Considine JA, Foyer CH, Considine MJ.** 2015. Spatio-temporal relief from hypoxia and production of reactive oxygen species during bud burst in grapevine (*Vitis vinifera*). *Annals of Botany* **116**, 703–711.

**Michailidis M, Karagiannis E, Tanou G, Sarrou E, Adamakis ID, Karamanoli K, Martens S, Molassiotis A.** 2018. Metabolic mechanisms underpinning vegetative bud dormancy release and shoot development in sweet cherry. *Environmental and Experimental Botany* **155**, 1–11.

**Nicolas WJ, Grison MS, Trépout S, Gaston A, Fouché M, Cordelières FP, Oparka K, Tilsner J, Brocard L, Bayer EM.** 2017. Architecture and permeability of post-cytokinesis plasmodesmata lacking cytoplasmic sleeves. *Nature Plants* **3**.

**Ophir R, Pang X, Halaly T, Venkateswari J, Lavee S, Galbraith D, Or E.** 2009. Gene-expression profiling of grape bud response to two alternative dormancy-release stimuli expose possible links between impaired mitochondrial activity, hypoxia, ethylene-ABA interplay and cell enlargement. *Plant Molecular Biology* **71**, 403–423.

**Or E, Vilozy I, Eyal Y, Ogrodovitch A.** 2000. The transduction of the signal for grape bud dormancy breaking induced by hydrogen cyanamide may involve the SNF-like protein kinase GDBRPK. *Plant Molecular Biology* **43**, 483–494.

**Or E, Vilozy I, Fennell A, Eyal Y, Ogrodovitch A.** 2002. Dormancy in grape buds: Isolation and characterization of catalase cDNA and analysis of its expression following chemical induction of bud dormancy release. *Plant Science* **162**, 121–130.

**Parada F, Noriega X, Dantas D, Bressan-Smith R, Pérez FJ.** 2016. Differences in respiration between dormant and non-dormant buds suggest the involvement of ABA in the development of endodormancy in grapevines. *Journal of Plant Physiology* **201**, 71–78.

**Paul LK, Rinne PLH, Van der Schoot C.** 2014. Shoot meristems of deciduous woody perennials: Self-organization and morphogenetic transitions. *Current Opinion in Plant Biology* **17**, 85–95.

**Petrie PR, Clingeffer PR.** 2005. Effects of temperature and light (before and after budburst) on inflorescence morphology and flower number of Chardonnay grapevines (*Vitis vinifera* L.). *Australian Journal of Grape and Wine Research* **11**, 59–65.

**Possingham J V.** 2004. On the growing of grapevines in the tropics. *Acta Horticulturae*.39–44.

**Rinne PLH, Welling A, Vahala J, Ripel L, Ruonala R, Kangasjärvi J, van Der Schoot C.** 2011. Chilling of Dormant Buds Hyperinduces FLOWERING LOCUS T and Recruits GA-Inducible 1,3-b-Glucanases to Reopen Signal Conduits and Release Dormancy in *Populus*. *The Plant Cell* **23**, 130–146.

**Sánchez LA, Dokoozlian NK.** 2005. Bud microclimate and fruitfulness in *Vitis vinifera* L. *American Journal of Enology and Viticulture* **56**, 319–329.

- Signorelli S, Agudelo-Romero P, Considine MJ, Foyer CH.** 2018. Roles for light, energy and oxygen in the fate of quiescent axillary buds. *Plant Physiology* **176**, 1171–1181.
- Skene KGM.** 1967. Gibberellin-like substances in root exudate of *Vitis vinifera*. *Planta* **74**, 250–262.
- Skene KGM, Antcliff AJ.** 1972. A comparative study of cytokinin levels in bleeding sap of *Vitis vinifera* (L.) and the two grapevine rootstocks, salt creek and 1613. *Journal of Experimental Botany* **23**, 282–293.
- Smýkal P, Vernoud V, Blair MW, Soukup A, Thompson RD.** 2014. The role of the testa during development and in establishment of dormancy of the legume seed. *Frontiers in Plant Science* **5**, 351.
- Sperry JS, Holbrook NM, Zimmermann MH, Tyree MT.** 1987. Spring filling of xylem vessels in wild grapevine. *Plant physiology* **83**, 414–417.
- The Jmol Team.** 2007. Jmol: an open-source Java viewer for chemical structures in 3D. [Jmol.sourceforge.net](http://jmol.sourceforge.net).
- Tilsner J, Nicolas W, Rosado A, Bayer EM.** 2016. Staying Tight: Plasmodesmal Membrane Contact Sites and the Control of Cell-to-Cell Connectivity in Plants. *Annual Review of Plant Biology* **67**, 337–364.
- Vergara R, Rubio S, Pérez FJ.** 2012. Hypoxia and hydrogen cyanamide induce bud-break and up-regulate hypoxic responsive genes (HRG) and VvFT in grapevine-buds. *Plant Molecular Biology* **79**, 171–178.
- Wang Z, Verboven P, Nicolai B.** 2017. Contrast-enhanced 3D micro-CT of plant tissues using different impregnation techniques. *Plant Methods* **13**, 1–16.
- Xiao Z, Rogiers SY, Sadras VO, Tyerman SD.** 2018. Hypoxia in grape berries: The role of seed respiration and lenticels on the berry pedicel and the possible link to cell death. *Journal of Experimental Botany* **69**, 2071–2083.
- Zhang Z, Zhuo X, Zhao K, Zheng T, Han Y, Yuan C, Zhang Q.** 2018. Transcriptome Profiles Reveal the Crucial Roles of Hormone and Sugar in the Bud Dormancy of *Prunus mume*. *Scientific Reports* **8**, 1–15.
- Zheng C, Acheampong AK, Shi Z, et al.** 2018. Abscisic acid catabolism enhances dormancy release of grapevine buds. *Plant Cell and Environment* **41**, 2490–2503.
- Zheng C, Halaly T, Acheampong AK, Takebayashi Y, Jikumar Y, Kamiya Y, Or E.** 2015. Abscisic acid (ABA) regulates grape bud dormancy, and dormancy release stimuli may act through modification of ABA metabolism. *Journal of Experimental Botany* **66**, 1527–1542.



## Tables and Figures

### Tables

No tables

### Figure Legends

**Figure 1.** *Effect of light on bud burst and bud respiration.* Bud burst percentages of grapevine buds treated with HC 1.25% (**A**) and untreated (**B**), grown under dark-light (DL, closed circles) and darkness (D, open circles) conditions. The bars indicate standard deviation,  $n=3$ . Respiration determined by CO<sub>2</sub> release (**C**) and O<sub>2</sub> consumption (**D**). Different letters indicate significant differences against the respect to control (0h) using a Tukey comparison ( $n=4$ ,  $p < 0.05$ ).

**Figure 2.** *Effect of scales on bud burst.* (**A**) C, control bud. P, peeled bud; (**B**) D C, darkness treatment in control buds. D P, darkness treatment in peeled buds. (**C**) O<sub>2</sub> C, hyperoxia treatment in control buds. O<sub>2</sub> P, hyperoxia treatment in peeled buds. The vertical bars indicate standard deviation.

**Figure 3.** *Effect of light on vascular development.* Micro-computed tomographies of buds (**A**). 0h C refers to 0h buds untreated with contrast agent caesium iodide (CsI). All the other buds were treated with contrast agent in order to visualize the vascular tissue (observed as rings and indicated with blue arrows); Apoplastic connectivity evidenced by acid fuchsin (**B**) and eosin Y (**C**) staining. Arrows in the magnified image indicate Eosin Y staining.

**Figure 4.** *Internal oxygen profiles and micro-computed tomography of a grapevine bud.* (**A**) 3D structure of the bud showing the electrode path. (**B**) O<sub>2</sub> profile graph overlapped with the path of the electrode. (**c**) Internal O<sub>2</sub> profile overlapped with the intensity of the signal determined by a probe line over the path in the  $\mu$ CT. To exemplify this figure represents the analysis of one bud (corresponding to D1 at 168h). A total of 12 buds used for internal O<sub>2</sub> were scanned by  $\mu$ CT including 0h, 168h D and 168h DL.

**Figure 5.** *Porosity and moisture of grapevine buds.* A. At the top, a sectioned bud is shown to depict the 3 evaluated parts of the bud, the green tissue, the trichomes and the outer scales. The porosity and the moisture as represented as percentage and were determined by tissue

density and weight respectively. B. Section of a  $\mu$ CT representing the 4 type of tissues evaluated to calculate the porosity by pixel analysis. C. Comparison of porosity determined by pixel analysis at 0h and 168h.

**Figure 6.** *Chemical modelling of rhodamine green, acid fuchsin and eosin Y in their associated and dissociated forms. (A)* Optimised structure and electron density. Electron density was generated using an isovalue of 0.0004. **(B)** Charges and dipole moments. The colours indicate the charge and the blue arrows indicate the dipole moment. **(C)** Electrostatic potentials. The red indicates electronegative zones whereas the blue electropositive zones.

**Figure 7.** *Solvent accessible surfaces for ionic forms of acid fuchsin and eosin Y. Anionic acid fuchsin (A) and anionic eosin Y (B).* A lateral, frontal and top view of each molecule is reported and the rough area of a pore that they need to pass through.

## Figures

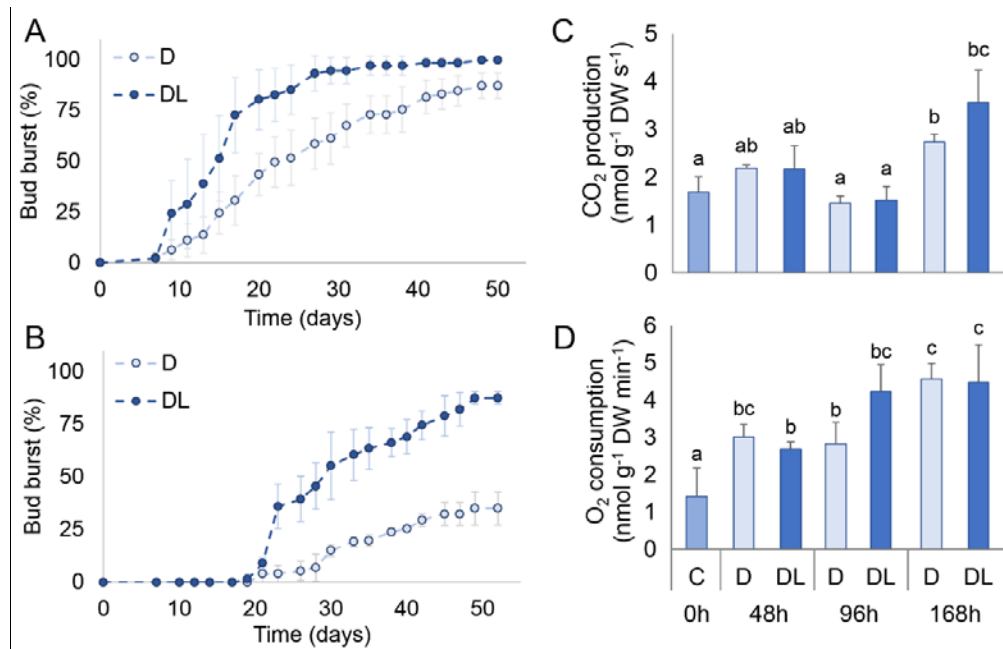

**Figure 1.** *Effect of light on bud burst and bud respiration.* Bud burst percentages of grapevine buds treated with HC 1.25% (**A**) and untreated (**B**), grown under dark-light (DL, closed circles) and darkness (D, open circles) conditions. The bars indicate standard deviation,  $n=3$ . Respiration determined by CO<sub>2</sub> release (**C**) and O<sub>2</sub> consumption (**D**). Different letters indicate significant differences against the respect to control (0h) using a Tukey comparison ( $n=4$ ,  $p < 0.05$ ).

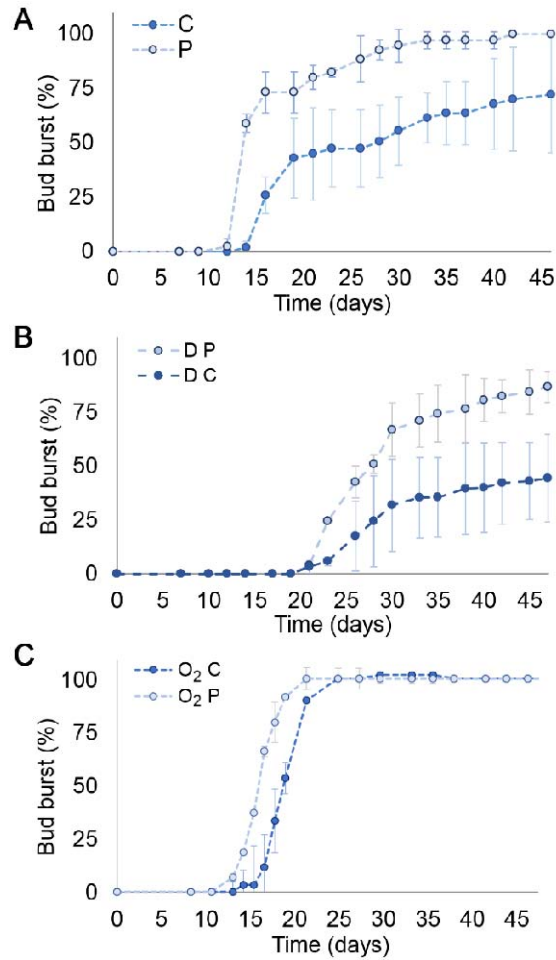

**Figure 2.** *Effect of scales on bud burst.* (A) C, control bud. P, peeled bud; (B) D C, darkness treatment in control buds. D P, darkness treatment in peeled buds. (C) O<sub>2</sub> C, hyperoxia treatment in control buds. O<sub>2</sub> P, hyperoxia treatment in peeled buds. The vertical bars indicate standard deviation.



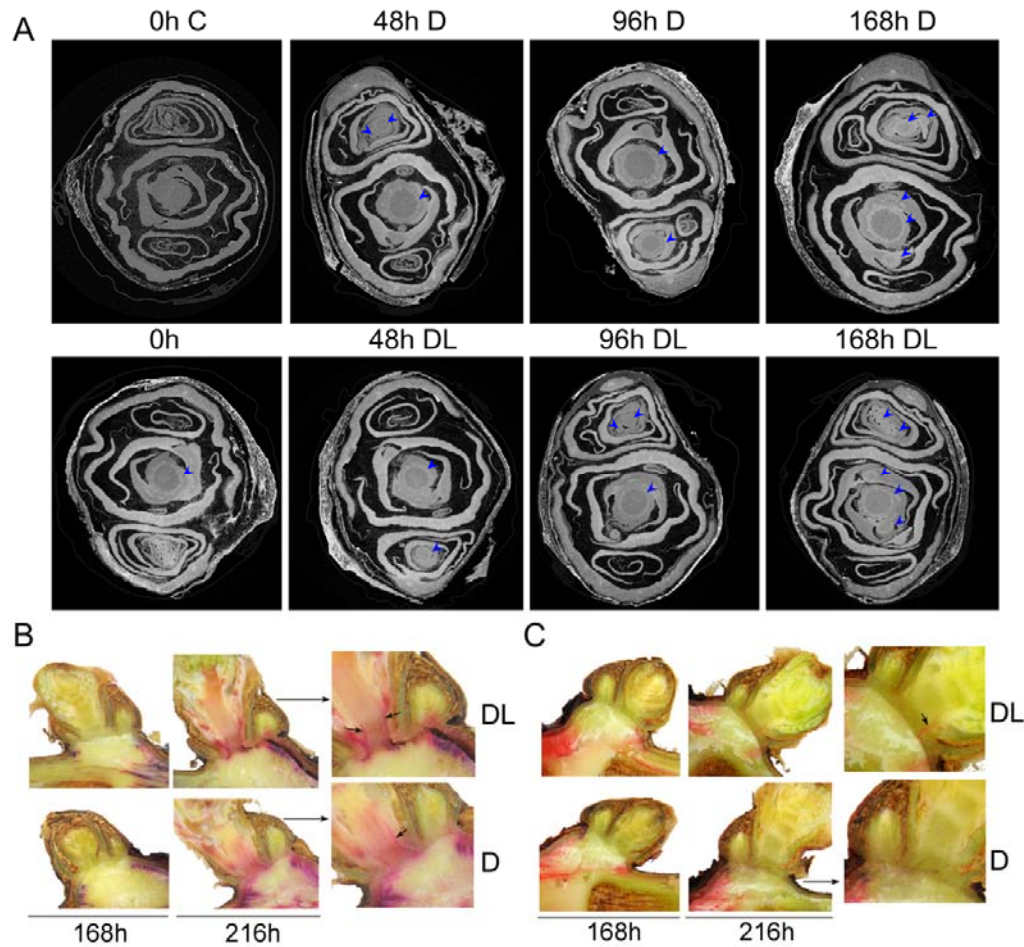

**Figure 3.** *Effect of light on vascular development.* Micro-computed tomographies of buds (A). 0h C refers to 0h buds untreated with contrast agent caesium iodide (CsI). All the other buds were treated with contrast agent in order to visualize the vascular tissue (observed as rings and indicated with blue arrows); Apoplastic connectivity evidenced by acid fuchsin (B) and eosin Y (C) staining. Arrows in the magnified image indicate Eosin Y staining. Refer also to Supplementary Data files.

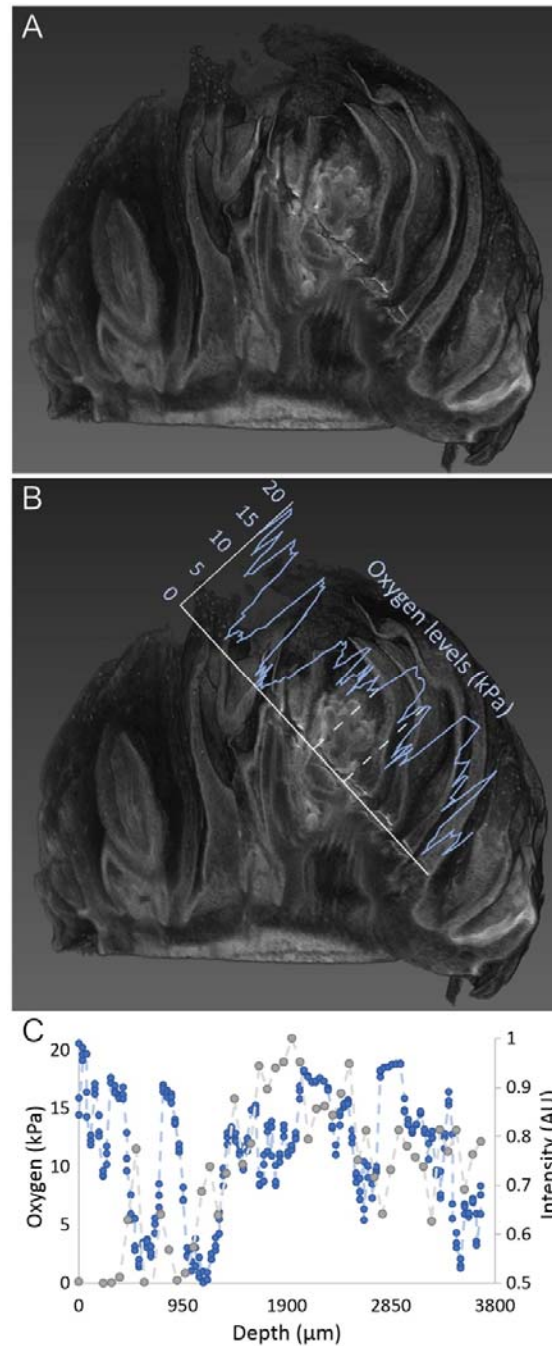

**Figure 4.** *Internal oxygen profiles and micro-computed tomography of a grapevine bud.* (A) 3D structure of the bud showing the electrode path. (B) O<sub>2</sub> profile graph overlapped with the path of the electrode. (C) Internal O<sub>2</sub> profile overlapped with the intensity of the signal determined by a probe line over the path in the  $\mu$ CT. To exemplify this figure represents the analysis of one bud (corresponding to D1 at 168h). A total of 12 buds used for internal O<sub>2</sub> were scanned by  $\mu$ CT including 0h, 168h D and 168h DL.

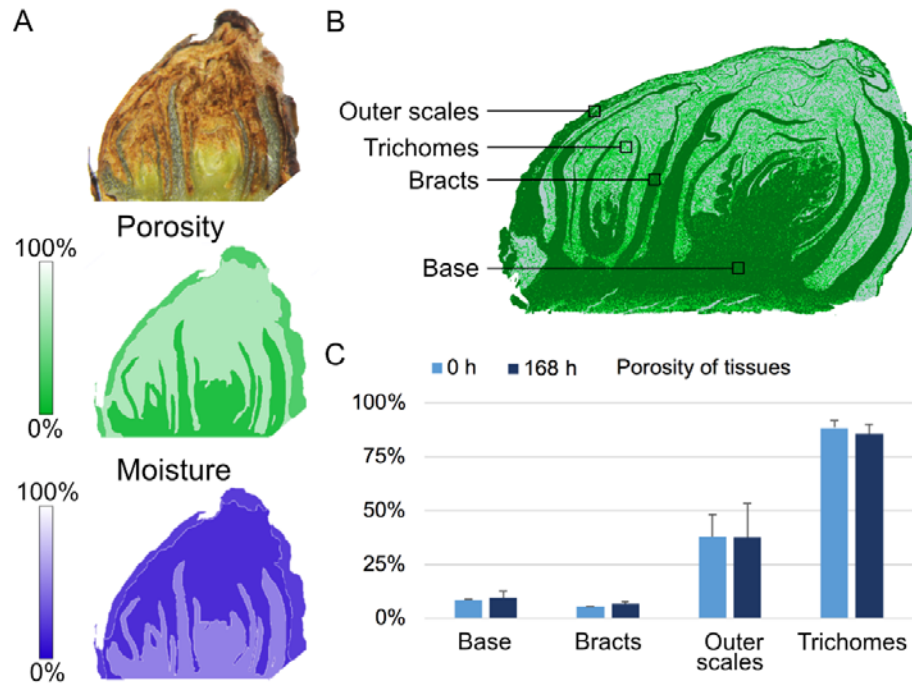

**Figure 5.** *Porosity and moisture of grapevine buds.* A. At the top, a sectioned bud is shown to depict the 3 evaluated parts of the bud, the green tissue, the trichomes and the outer scales. The porosity and the moisture as represented as percentage and were determined by tissue density and weight respectively. B. Section of a  $\mu$ CT representing the 4 type of tissues evaluated to calculate the porosity by pixel analysis. C. Comparison of porosity determined by pixel analysis at 0h and 168h.

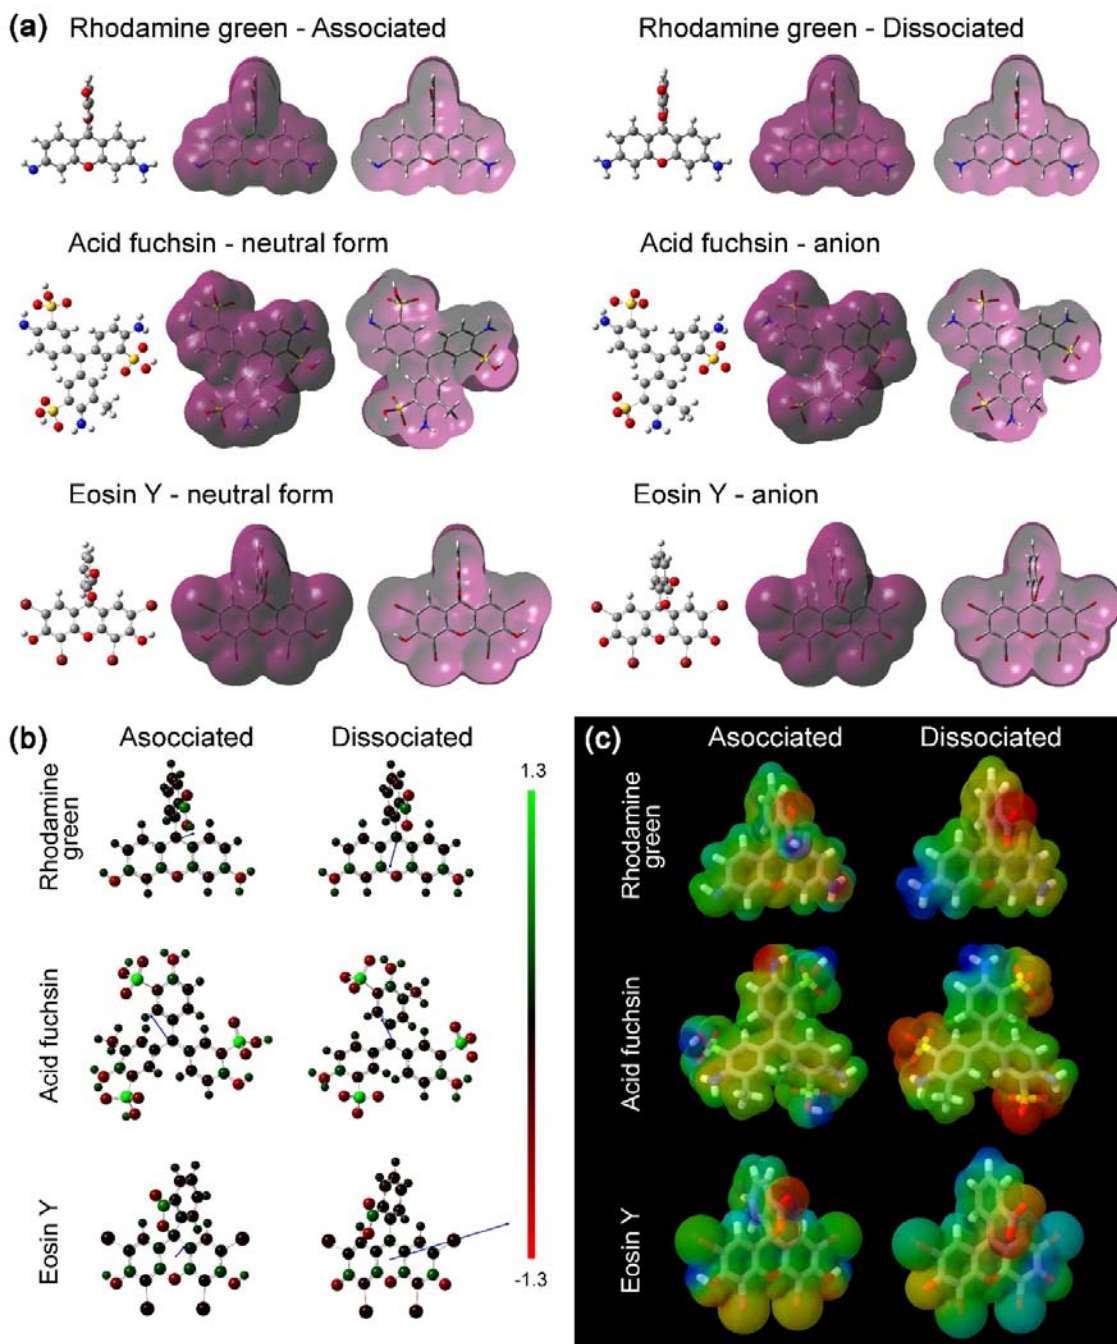

**Figure 6.** Chemical modelling of rhodamine green, acid fuchsin and eosin Y in their associated and dissociated forms. **(A)** Optimised structure and electron density. Electron density was generated using an isovalue of 0.0004. **(B)** Charges and dipole moments. The colours indicate the charge and the blue arrows indicate the dipole moment. **(C)** Electrostatic potentials. The red indicates electronegative zones whereas the blue electropositive zones.



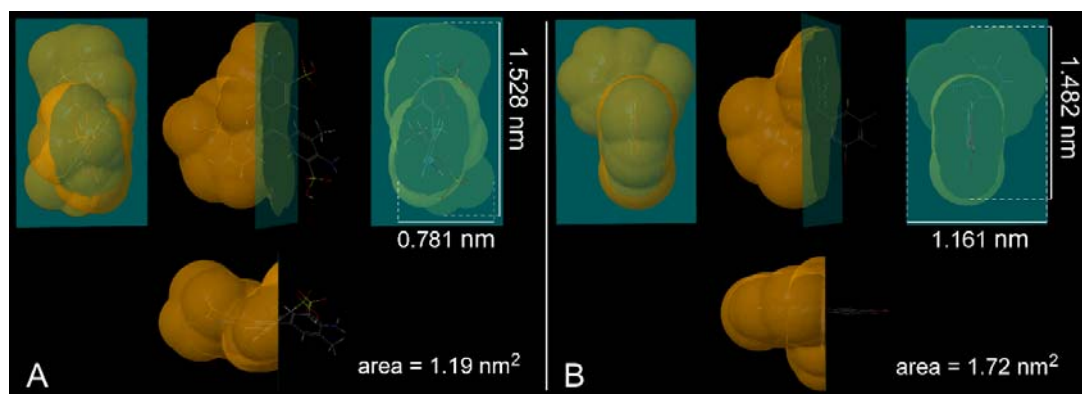

**Figure 7.** *Solvent accessible surfaces for ionic forms of acid fuchsin and eosin Y. Anionic acid fuchsin (A) and anionic eosin Y (B). A lateral, frontal and top view of each molecule is reported and the rough area of a pore that they need to pass through.*

### Cover image

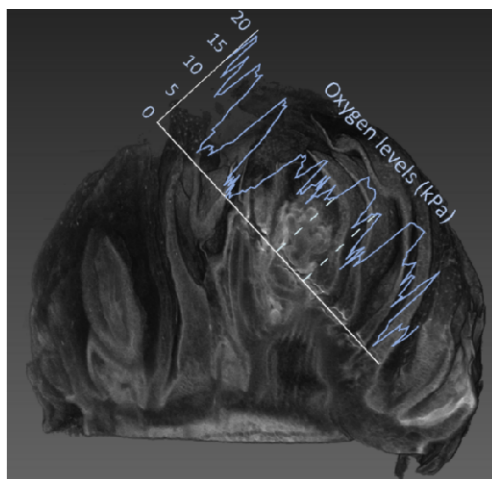

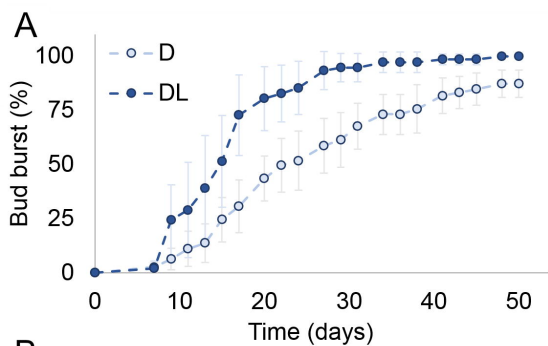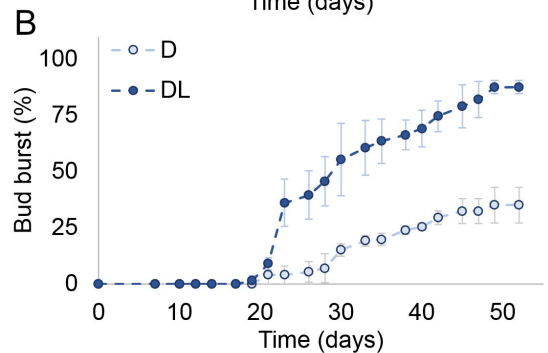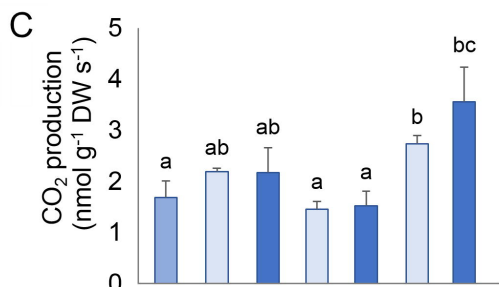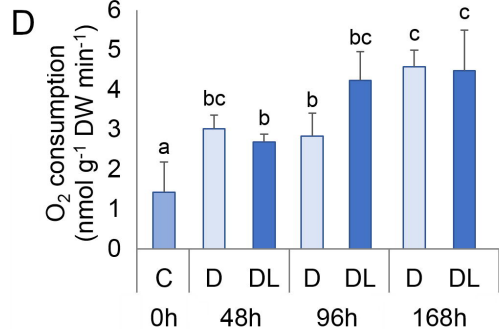

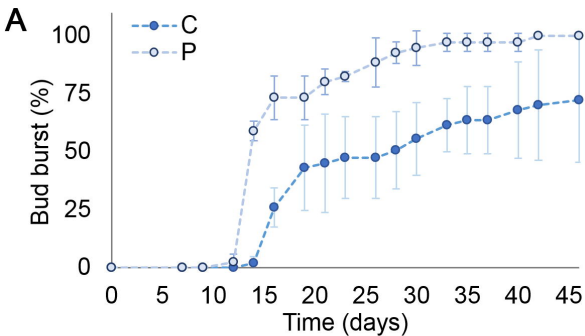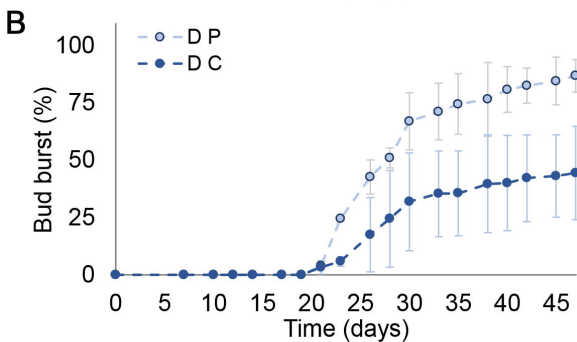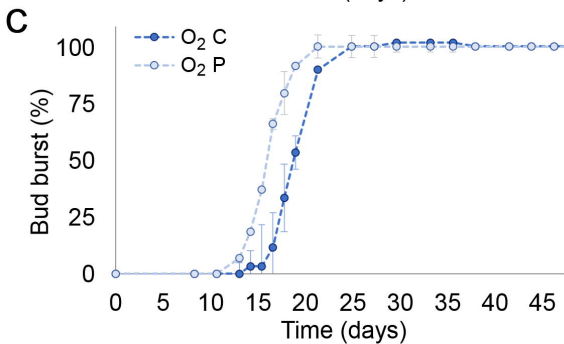

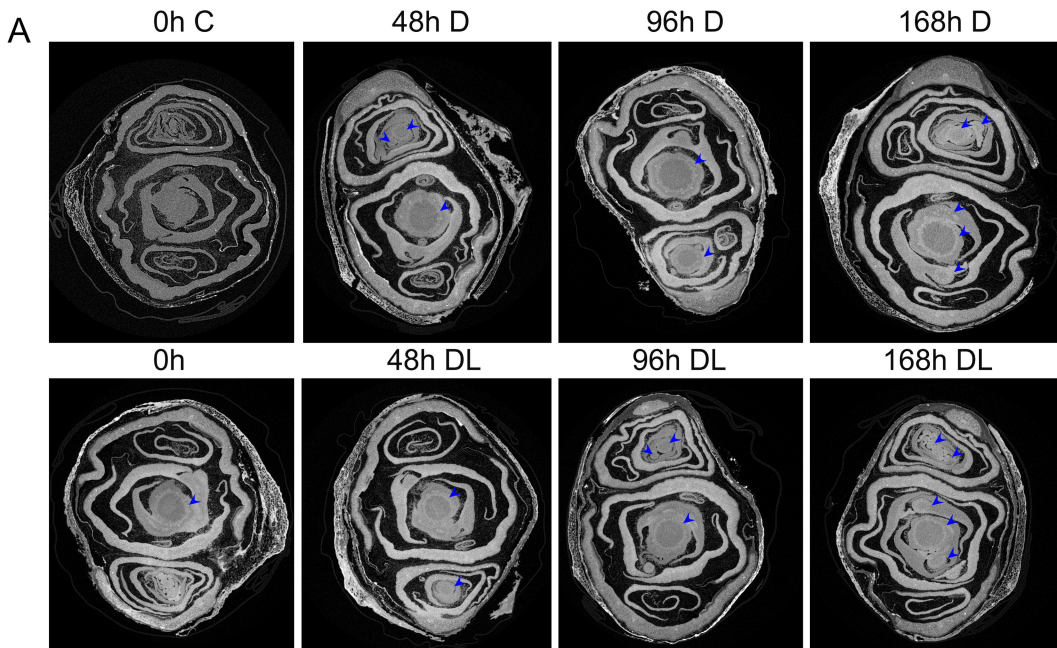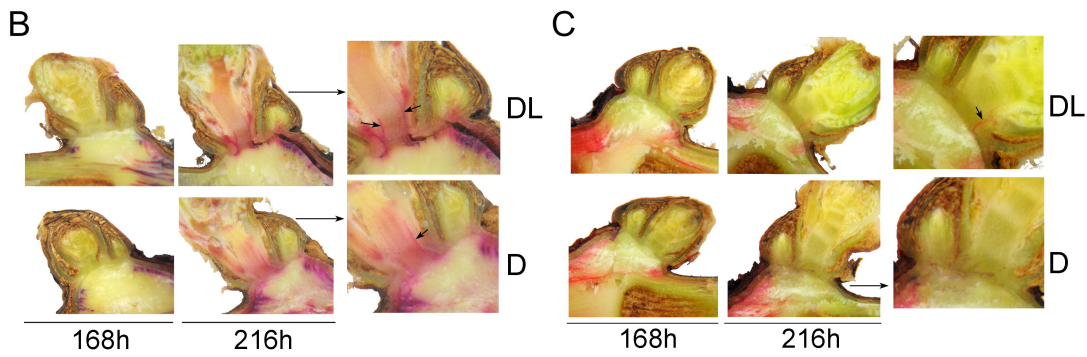



A

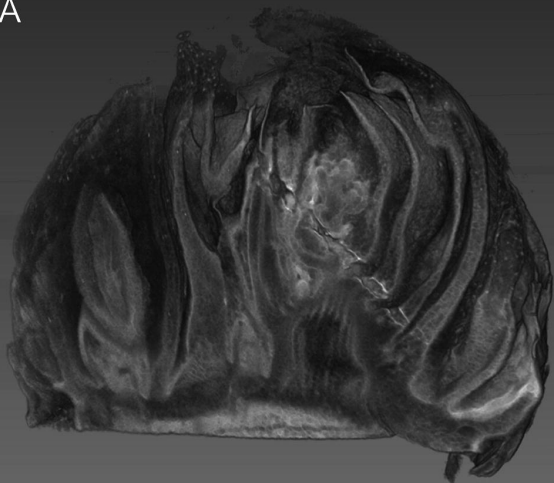

B

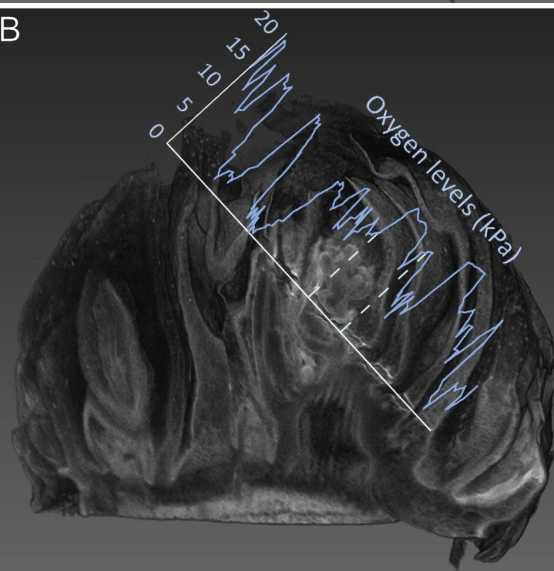

C

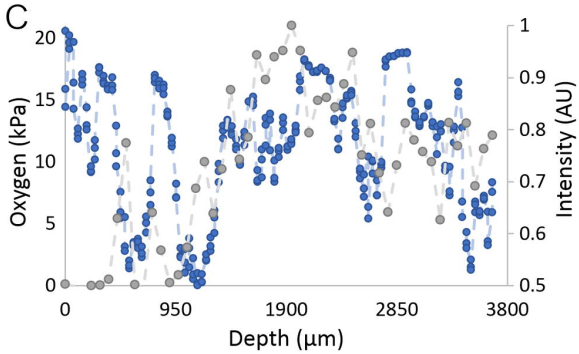

A

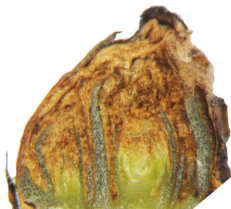

Porosity

100%

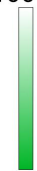

0%

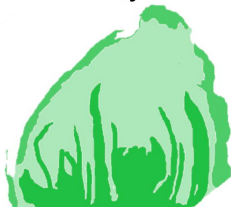

Moisture

100%

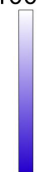

0%

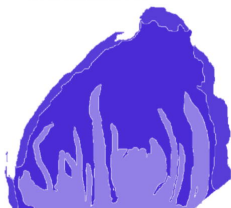

B

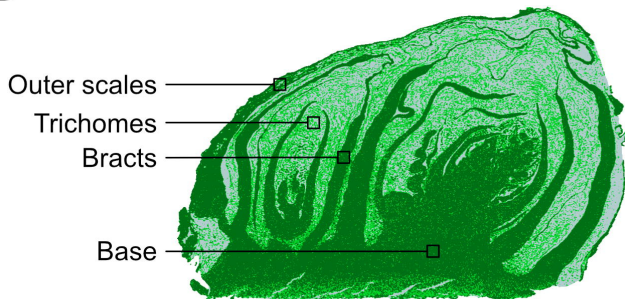

C

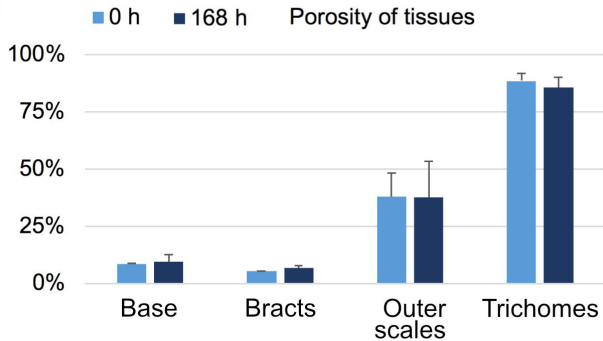

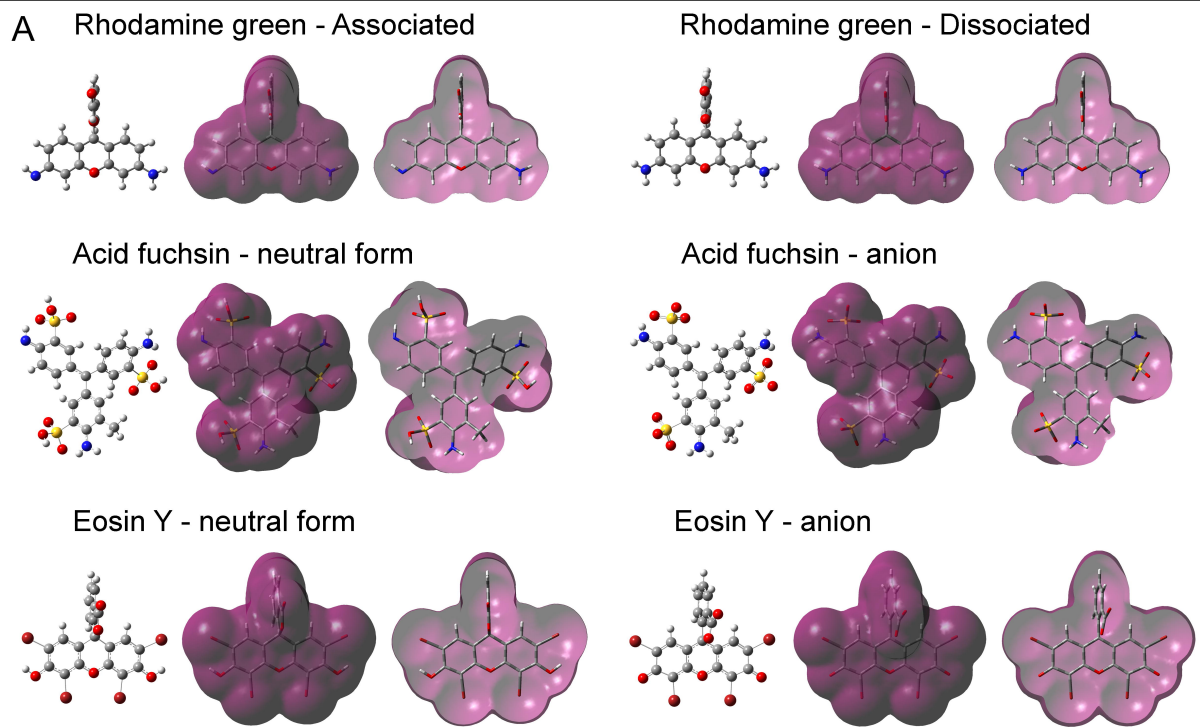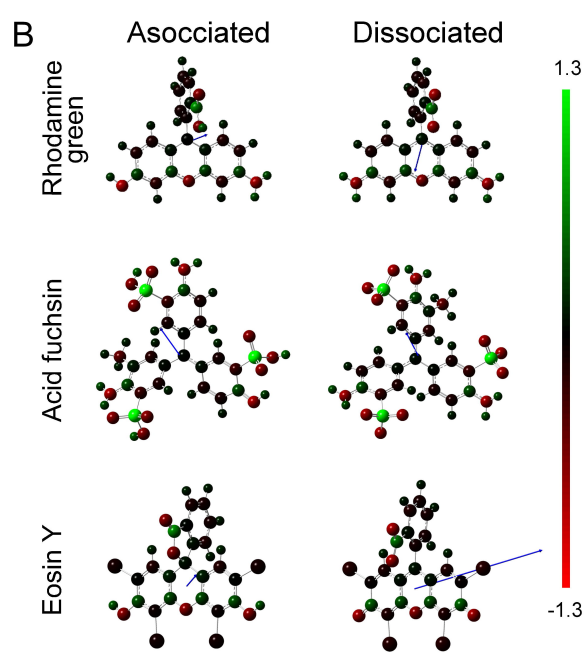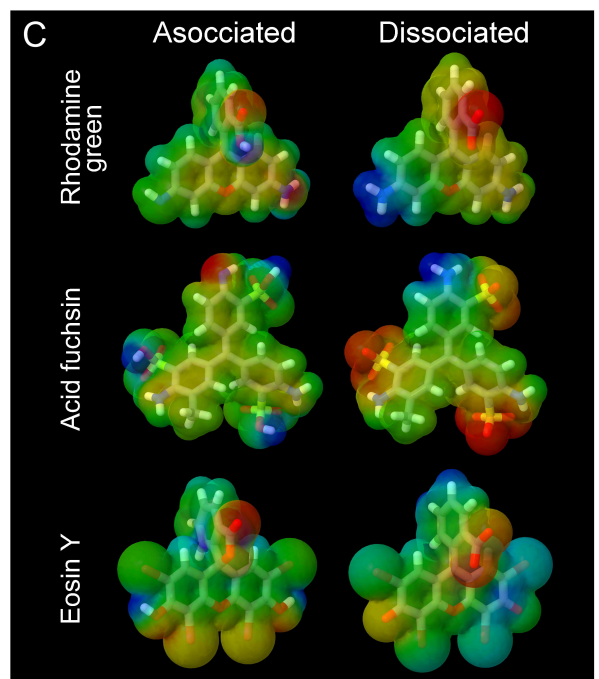

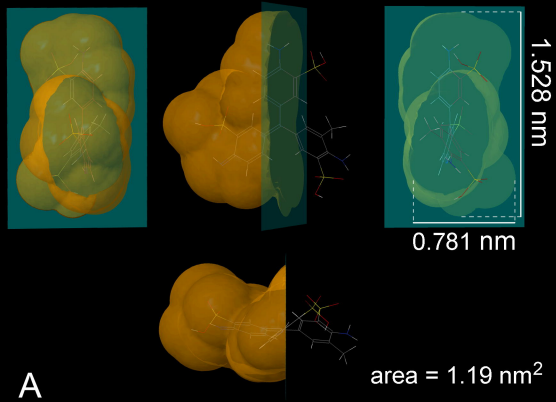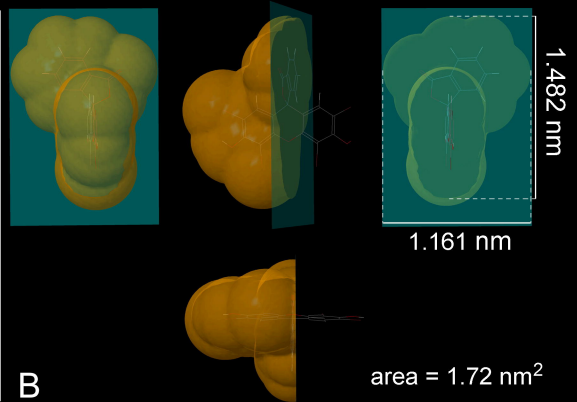

Source: https://www.biorxiv.org/content/10.1101/476879v1.full.pdf
